# Supplementary material for: Evaluating the Effect of Irradiation on the Densities of Two RNA Viruses in Glossina morsitans morsitans
Source: MDPI journal article supplement (doi:10.3390/insects14040397), 2023-04-20
Supplement: s1 [file s1]

# Evaluating the effect of irradiation on the densities of two RNA viruses in *Glossina morsitans morsitans*

Mirieri, C.K., et al.

13-7-2022

```
#setwd("D:/analysis/iflanegemanuscript2023/final")

library(ggplot2)
library(MASS)
library(rmarkdown)
library(knitr)
library(lme4)

## Loading required package: Matrix

library(MuMIn)
library(ggthemes) # Load
library(datasets)
library(plyr)
library(dplyr)

##
## Attaching package: 'dplyr'

## The following objects are masked from 'package:plyr':
##
##      arrange, count, desc, failwith, id, mutate, rename, summarise,
##      summarize

## The following object is masked from 'package:MASS':
##
##      select

## The following objects are masked from 'package:stats':
##
##      filter, lag

## The following objects are masked from 'package:base':
##
##      intersect, setdiff, setequal, union

library(tidyverse)

## — Attaching packages —————
tidyverse 1.3.1 —
```

```
## ✓ tibble 3.1.7      ✓ purrr 0.3.4
## ✓ tidyr 1.2.0      ✓ stringr 1.4.0
## ✓ readr 2.1.2      ✓ forcats 0.5.1

## — Conflicts —————
tidyverse_conflicts() —
## ✗ dplyr::arrange() masks plyr::arrange()
## ✗ purrr::compact() masks plyr::compact()
## ✗ dplyr::count() masks plyr::count()
## ✗ tidyr::expand() masks Matrix::expand()
## ✗ dplyr::failwith() masks plyr::failwith()
## ✗ dplyr::filter() masks stats::filter()
## ✗ dplyr::id() masks plyr::id()
## ✗ dplyr::lag() masks stats::lag()
## ✗ dplyr::mutate() masks plyr::mutate()
## ✗ tidyr::pack() masks Matrix::pack()
## ✗ dplyr::rename() masks plyr::rename()
## ✗ dplyr::select() masks MASS::select()
## ✗ dplyr::summarise() masks plyr::summarise()
## ✗ dplyr::summarize() masks plyr::summarize()
## ✗ tidyr::unpack() masks Matrix::unpack()
```

Working directory

```
#-----

##Normality for neg, b and C

#Normality for neg

qpcr <- read.csv("Iflaneg_may_2023.csv",sep="," , row.names=NULL)

#qpcr$Life_stage=as.factor(qpcr$Life_stage)
qpcr$Irradiation_dose=as.factor(qpcr$Irradiation_dose)
str(qpcr)

## 'data.frame': 186 obs. of 11 variables:
## $ Target : chr "GmmIV" "GmmIV" "GmmIV" "GmmIV" ...
## $ Sample : chr "17A" "17B" "18A" "18B" ...
## $ Irradiation_dose : Factor w/ 5 levels "0","70","110",...: 1 1
1 1 1 1 1 1 2 2 ...
## $ Dpi : int 3 3 3 3 0 0 0 0 3 3 ...
## $ Life_stage : chr "Adult (3 dpi)" "Adult (3 dpi)"
"Adult (3 dpi)" "Adult (3 dpi)" ...
## $ Irradiation_conditions: chr "Hypoxia" "Hypoxia" "Normoxia"
"Normoxia" ...
## $ Replicate : int 1 1 1 1 1 1 1 1 1 1 ...
## $ Expression : num 0.109 0.125 0.135 0.125 1.013 ...
```

```
## $ Mean.Cq          : num  22 22.2 21.7 21.9 20.1 ...
## $ Normalized_expression : num  0.46 0.529 0.569 0.529 3.096 ...
## $ Transformed        : num  -0.806 -0.658 -0.581 -0.657 1.069
...
```

```
attach(qpcr)
```

```
#head(neg)
```

```
qpcr=na.omit(qpcr)
```

```
qpcr
```

```
##      Target Sample Irradiation_dose Dpi    Life_stage
Irradiation_conditions
## 1      GmmIV      17A                0    3 Adult (3 dpi)
Hypoxia
## 2      GmmIV      17B                0    3 Adult (3 dpi)
Hypoxia
## 3      GmmIV      18A                0    3 Adult (3 dpi)
Normoxia
## 4      GmmIV      18B                0    3 Adult (3 dpi)
Normoxia
## 5      GmmIV       8A                0    0 Pupae (0 dpi)
Hypoxia
## 6      GmmIV       8B                0    0 Pupae (0 dpi)
Hypoxia
## 7      GmmIV       9A                0    0 Pupae (0 dpi)
Normoxia
## 8      GmmIV       9B                0    0 Pupae (0 dpi)
Normoxia
## 9      GmmIV      11A               70    3 Adult (3 dpi)
Hypoxia
## 10     GmmIV      11B               70    3 Adult (3 dpi)
Hypoxia
## 11     GmmIV      14A               70    3 Adult (3 dpi)
Normoxia
## 12     GmmIV      14B               70    3 Adult (3 dpi)
Normoxia
## 13     GmmIV       2A               70    0 Pupae (0 dpi)
Hypoxia
## 14     GmmIV       2B               70    0 Pupae (0 dpi)
Hypoxia
## 15     GmmIV       5A               70    0 Pupae (0 dpi)
Normoxia
## 16     GmmIV       5B               70    0 Pupae (0 dpi)
Normoxia
## 17     GmmIV      12A              110    3 Adult (3 dpi)
Hypoxia
## 18     GmmIV      12B              110    3 Adult (3 dpi)
Hypoxia
## 19     GmmIV      15A              110    3 Adult (3 dpi)
Normoxia
```

|          |       |     |     |                 |
|----------|-------|-----|-----|-----------------|
| ## 20    | GmmIV | 15B | 110 | 3 Adult (3 dpi) |
| Normoxia |       |     |     |                 |
| ## 21    | GmmIV | 3A  | 110 | 0 Pupae (0 dpi) |
| Hypoxia  |       |     |     |                 |
| ## 22    | GmmIV | 3B  | 110 | 0 Pupae (0 dpi) |
| Hypoxia  |       |     |     |                 |
| ## 23    | GmmIV | 6A  | 110 | 0 Pupae (0 dpi) |
| Normoxia |       |     |     |                 |
| ## 24    | GmmIV | 6B  | 110 | 0 Pupae (0 dpi) |
| Normoxia |       |     |     |                 |
| ## 25    | GmmIV | 13A | 150 | 3 Adult (3 dpi) |
| Hypoxia  |       |     |     |                 |
| ## 26    | GmmIV | 13B | 150 | 3 Adult (3 dpi) |
| Hypoxia  |       |     |     |                 |
| ## 27    | GmmIV | 16B | 150 | 3 Adult (3 dpi) |
| Normoxia |       |     |     |                 |
| ## 28    | GmmIV | 4A  | 150 | 0 Pupae (0 dpi) |
| Hypoxia  |       |     |     |                 |
| ## 29    | GmmIV | 4B  | 150 | 0 Pupae (0 dpi) |
| Hypoxia  |       |     |     |                 |
| ## 30    | GmmIV | 7A  | 150 | 0 Pupae (0 dpi) |
| Normoxia |       |     |     |                 |
| ## 31    | GmmIV | 7B  | 150 | 0 Pupae (0 dpi) |
| Normoxia |       |     |     |                 |
| ## 32    | GmmIV | 1A  | 0   | 0 Pupae (0 dpi) |
| Normoxia |       |     |     |                 |
| ## 33    | GmmIV | 1B  | 0   | 0 Pupae (0 dpi) |
| Normoxia |       |     |     |                 |
| ## 34    | GmmIV | 1A  | 0   | 0 Pupae (0 dpi) |
| Hypoxia  |       |     |     |                 |
| ## 35    | GmmIV | 1b  | 0   | 0 Pupae (0 dpi) |
| Hypoxia  |       |     |     |                 |
| ## 36    | GmmIV | 2a  | 0   | 3 Adult (3 dpi) |
| Hypoxia  |       |     |     |                 |
| ## 37    | GmmIV | 2b  | 0   | 3 Adult (3 dpi) |
| Hypoxia  |       |     |     |                 |
| ## 38    | GmmIV | 3a  | 0   | 3 Adult (3 dpi) |
| Normoxia |       |     |     |                 |
| ## 39    | GmmIV | 3b  | 0   | 3 Adult (3 dpi) |
| Normoxia |       |     |     |                 |
| ## 40    | GmmIV | 21A | 70  | 0 Pupae (0 dpi) |
| Normoxia |       |     |     |                 |
| ## 41    | GmmIV | 21B | 70  | 0 Pupae (0 dpi) |
| Normoxia |       |     |     |                 |
| ## 42    | GmmIV | 3A  | 70  | 3 Adult (3 dpi) |
| Hypoxia  |       |     |     |                 |
| ## 43    | GmmIV | 3B  | 70  | 3 Adult (3 dpi) |
| Hypoxia  |       |     |     |                 |
| ## 44    | GmmIV | 6A  | 70  | 3 Adult (3 dpi) |
| Normoxia |       |     |     |                 |

|          |       |     |     |                 |
|----------|-------|-----|-----|-----------------|
| ## 45    | GmmIV | 6B  | 70  | 3 Adult (3 dpi) |
| Normoxia |       |     |     |                 |
| ## 46    | GmmIV | 2A  | 70  | 0 Pupae (0 dpi) |
| Hypoxia  |       |     |     |                 |
| ## 47    | GmmIV | 2B  | 70  | 0 Pupae (0 dpi) |
| Hypoxia  |       |     |     |                 |
| ## 48    | GmmIV | 22A | 110 | 0 Pupae (0 dpi) |
| Normoxia |       |     |     |                 |
| ## 49    | GmmIV | 22B | 110 | 0 Pupae (0 dpi) |
| Normoxia |       |     |     |                 |
| ## 50    | GmmIV | 4A  | 110 | 3 Adult (3 dpi) |
| Hypoxia  |       |     |     |                 |
| ## 51    | GmmIV | 4B  | 110 | 3 Adult (3 dpi) |
| Hypoxia  |       |     |     |                 |
| ## 52    | GmmIV | 7A  | 110 | 3 Adult (3 dpi) |
| Normoxia |       |     |     |                 |
| ## 53    | GmmIV | 7B  | 110 | 3 Adult (3 dpi) |
| Normoxia |       |     |     |                 |
| ## 54    | GmmIV | 3A  | 110 | 0 Pupae (0 dpi) |
| Hypoxia  |       |     |     |                 |
| ## 55    | GmmIV | 3B  | 110 | 0 Pupae (0 dpi) |
| Hypoxia  |       |     |     |                 |
| ## 56    | GmmIV | 20A | 150 | 0 Pupae (0 dpi) |
| Hypoxia  |       |     |     |                 |
| ## 57    | GmmIV | 20B | 150 | 0 Pupae (0 dpi) |
| Hypoxia  |       |     |     |                 |
| ## 58    | GmmIV | 23A | 150 | 0 Pupae (0 dpi) |
| Normoxia |       |     |     |                 |
| ## 59    | GmmIV | 23B | 150 | 0 Pupae (0 dpi) |
| Normoxia |       |     |     |                 |
| ## 60    | GmmIV | 5A  | 150 | 3 Adult (3 dpi) |
| Hypoxia  |       |     |     |                 |
| ## 61    | GmmIV | 5B  | 150 | 3 Adult (3 dpi) |
| Hypoxia  |       |     |     |                 |
| ## 62    | GmmIV | 8A  | 150 | 3 Adult (3 dpi) |
| Normoxia |       |     |     |                 |
| ## 63    | GmmIV | 8B  | 150 | 3 Adult (3 dpi) |
| Normoxia |       |     |     |                 |
| ## 64    | GmmIV | 16A | 0   | 0 Pupae (0 dpi) |
| Hypoxia  |       |     |     |                 |
| ## 65    | GmmIV | 16B | 0   | 0 Pupae (0 dpi) |
| Hypoxia  |       |     |     |                 |
| ## 66    | GmmIV | 17A | 0   | 3 Adult (3 dpi) |
| Normoxia |       |     |     |                 |
| ## 67    | GmmIV | 17B | 0   | 3 Adult (3 dpi) |
| Normoxia |       |     |     |                 |
| ## 68    | GmmIV | 4a  | 0   | 3 Adult (3 dpi) |
| Hypoxia  |       |     |     |                 |
| ## 69    | GmmIV | 4b  | 0   | 3 Adult (3 dpi) |
| Hypoxia  |       |     |     |                 |

|          |         |     |     |                 |
|----------|---------|-----|-----|-----------------|
| ## 70    | GmmIV   | 10A | 110 | 0 Pupae (0 dpi) |
| Hypoxia  |         |     |     |                 |
| ## 71    | GmmIV   | 10B | 110 | 0 Pupae (0 dpi) |
| Hypoxia  |         |     |     |                 |
| ## 72    | GmmIV   | 13A | 70  | 0 Pupae (0 dpi) |
| Normoxia |         |     |     |                 |
| ## 73    | GmmIV   | 13B | 70  | 0 Pupae (0 dpi) |
| Normoxia |         |     |     |                 |
| ## 74    | GmmIV   | 19A | 110 | 3 Adult (3 dpi) |
| Hypoxia  |         |     |     |                 |
| ## 75    | GmmIV   | 19B | 110 | 3 Adult (3 dpi) |
| Hypoxia  |         |     |     |                 |
| ## 76    | GmmIV   | 22A | 70  | 3 Adult (3 dpi) |
| Normoxia |         |     |     |                 |
| ## 77    | GmmIV   | 22B | 70  | 3 Adult (3 dpi) |
| Normoxia |         |     |     |                 |
| ## 78    | GmmIV   | 11A | 150 | 0 Pupae (0 dpi) |
| Hypoxia  |         |     |     |                 |
| ## 79    | GmmIV   | 14A | 110 | 0 Pupae (0 dpi) |
| Normoxia |         |     |     |                 |
| ## 80    | GmmIV   | 14B | 110 | 0 Pupae (0 dpi) |
| Normoxia |         |     |     |                 |
| ## 81    | GmmIV   | 20A | 150 | 3 Adult (3 dpi) |
| Hypoxia  |         |     |     |                 |
| ## 82    | GmmIV   | 20B | 150 | 3 Adult (3 dpi) |
| Hypoxia  |         |     |     |                 |
| ## 83    | GmmIV   | 4A  | 110 | 3 Adult (3 dpi) |
| Normoxia |         |     |     |                 |
| ## 84    | GmmIV   | 4B  | 110 | 3 Adult (3 dpi) |
| Normoxia |         |     |     |                 |
| ## 85    | GmmIV   | 12A | 190 | 0 Pupae (0 dpi) |
| Hypoxia  |         |     |     |                 |
| ## 86    | GmmIV   | 12B | 190 | 0 Pupae (0 dpi) |
| Hypoxia  |         |     |     |                 |
| ## 87    | GmmIV   | 15A | 150 | 0 Pupae (0 dpi) |
| Normoxia |         |     |     |                 |
| ## 88    | GmmIV   | 15B | 150 | 0 Pupae (0 dpi) |
| Normoxia |         |     |     |                 |
| ## 89    | GmmIV   | 21A | 190 | 3 Adult (3 dpi) |
| Hypoxia  |         |     |     |                 |
| ## 90    | GmmIV   | 21B | 190 | 3 Adult (3 dpi) |
| Hypoxia  |         |     |     |                 |
| ## 91    | GmmIV   | 5A  | 150 | 3 Adult (3 dpi) |
| Normoxia |         |     |     |                 |
| ## 92    | GmmIV   | 5B  | 150 | 3 Adult (3 dpi) |
| Normoxia |         |     |     |                 |
| ## 93    | GmmNegV | 17A | 0   | 3 Adult (3 dpi) |
| Hypoxia  |         |     |     |                 |
| ## 94    | GmmNegV | 17B | 0   | 3 Adult (3 dpi) |
| Hypoxia  |         |     |     |                 |

|        |          |     |    |                 |
|--------|----------|-----|----|-----------------|
| ## 95  | GmmNegV  | 18A | 0  | 3 Adult (3 dpi) |
|        | Normoxia |     |    |                 |
| ## 96  | GmmNegV  | 18B | 0  | 3 Adult (3 dpi) |
|        | Normoxia |     |    |                 |
| ## 97  | GmmNegV  | 8A  | 0  | 0 Pupae (0 dpi) |
|        | Hypoxia  |     |    |                 |
| ## 98  | GmmNegV  | 8B  | 0  | 0 Pupae (0 dpi) |
|        | Hypoxia  |     |    |                 |
| ## 99  | GmmNegV  | 9A  | 0  | 0 Pupae (0 dpi) |
|        | Normoxia |     |    |                 |
| ## 100 | GmmNegV  | 9B  | 0  | 0 Pupae (0 dpi) |
|        | Normoxia |     |    |                 |
| ## 101 | GmmNegV  | 16B | 0  | 0 Pupae (0 dpi) |
|        | Hypoxia  |     |    |                 |
| ## 102 | GmmNegV  | 16B | 0  | 0 Pupae (0 dpi) |
|        | Hypoxia  |     |    |                 |
| ## 103 | GmmNegV  | 17A | 0  | 3 Adult (3 dpi) |
|        | Normoxia |     |    |                 |
| ## 104 | GmmNegV  | 17B | 0  | 3 Adult (3 dpi) |
|        | Normoxia |     |    |                 |
| ## 105 | GmmNegV  | 6A  | 0  | 3 Adult (3 dpi) |
|        | Normoxia |     |    |                 |
| ## 106 | GmmNegV  | 6B  | 0  | 3 Adult (3 dpi) |
|        | Normoxia |     |    |                 |
| ## 107 | GmmNegV  | 1A  | 0  | 0 Pupae (0 dpi) |
|        | Hypoxia  |     |    |                 |
| ## 108 | GmmNegV  | 1B  | 0  | 0 Pupae (0 dpi) |
|        | Hypoxia  |     |    |                 |
| ## 109 | GmmNegV  | 2A  | 0  | 3 Adult (3 dpi) |
|        | Hypoxia  |     |    |                 |
| ## 110 | GmmNegV  | 2B  | 0  | 3 Adult (3 dpi) |
|        | Hypoxia  |     |    |                 |
| ## 111 | GmmNegV  | 3a  | 0  | 3 Adult (3 dpi) |
|        | Normoxia |     |    |                 |
| ## 112 | GmmNegV  | 3b  | 0  | 3 Adult (3 dpi) |
|        | Normoxia |     |    |                 |
| ## 113 | GmmNegV  | 4a  | 0  | 3 Adult (3 dpi) |
|        | Hypoxia  |     |    |                 |
| ## 114 | GmmNegV  | 4b  | 0  | 3 Adult (3 dpi) |
|        | Hypoxia  |     |    |                 |
| ## 115 | GmmNegV  | 11A | 70 | 3 Adult (3 dpi) |
|        | Hypoxia  |     |    |                 |
| ## 116 | GmmNegV  | 11B | 70 | 3 Adult (3 dpi) |
|        | Hypoxia  |     |    |                 |
| ## 117 | GmmNegV  | 14A | 70 | 3 Adult (3 dpi) |
|        | Normoxia |     |    |                 |
| ## 118 | GmmNegV  | 14B | 70 | 3 Adult (3 dpi) |
|        | Normoxia |     |    |                 |
| ## 119 | GmmNegV  | 21A | 70 | 0 Pupae (0 dpi) |
|        | Normoxia |     |    |                 |

|                |     |     |                 |
|----------------|-----|-----|-----------------|
| ## 120 GmmNegV | 21B | 70  | 0 Pupae (0 dpi) |
| Normoxia       |     |     |                 |
| ## 121 GmmNegV | 2A  | 70  | 0 Pupae (0 dpi) |
| Hypoxia        |     |     |                 |
| ## 122 GmmNegV | 2B  | 70  | 0 Pupae (0 dpi) |
| Hypoxia        |     |     |                 |
| ## 123 GmmNegV | 5A  | 70  | 0 Pupae (0 dpi) |
| Normoxia       |     |     |                 |
| ## 124 GmmNegV | 5B  | 70  | 0 Pupae (0 dpi) |
| Normoxia       |     |     |                 |
| ## 125 GmmNegV | 10A | 110 | 0 Pupae (0 dpi) |
| Hypoxia        |     |     |                 |
| ## 126 GmmNegV | 10B | 110 | 0 Pupae (0 dpi) |
| Hypoxia        |     |     |                 |
| ## 127 GmmNegV | 13A | 70  | 0 Pupae (0 dpi) |
| Normoxia       |     |     |                 |
| ## 128 GmmNegV | 13B | 70  | 0 Pupae (0 dpi) |
| Normoxia       |     |     |                 |
| ## 129 GmmNegV | 19A | 110 | 3 Adult (3 dpi) |
| Hypoxia        |     |     |                 |
| ## 130 GmmNegV | 19B | 110 | 3 Adult (3 dpi) |
| Hypoxia        |     |     |                 |
| ## 131 GmmNegV | 22A | 70  | 3 Adult (3 dpi) |
| Normoxia       |     |     |                 |
| ## 132 GmmNegV | 22B | 70  | 3 Adult (3 dpi) |
| Normoxia       |     |     |                 |
| ## 133 GmmNegV | 3A  | 70  | 3 Adult (3 dpi) |
| Hypoxia        |     |     |                 |
| ## 134 GmmNegV | 3B  | 70  | 3 Adult (3 dpi) |
| Hypoxia        |     |     |                 |
| ## 135 GmmNegV | 6A  | 70  | 3 Adult (3 dpi) |
| Normoxia       |     |     |                 |
| ## 136 GmmNegV | 6B  | 70  | 3 Adult (3 dpi) |
| Normoxia       |     |     |                 |
| ## 137 GmmNegV | 2A  | 70  | 0 Pupae (0 dpi) |
| Hypoxia        |     |     |                 |
| ## 138 GmmNegV | 2B  | 70  | 0 Pupae (0 dpi) |
| Hypoxia        |     |     |                 |
| ## 139 GmmNegV | 12A | 110 | 3 Adult (3 dpi) |
| Hypoxia        |     |     |                 |
| ## 140 GmmNegV | 12B | 110 | 3 Adult (3 dpi) |
| Hypoxia        |     |     |                 |
| ## 141 GmmNegV | 15A | 110 | 3 Adult (3 dpi) |
| Normoxia       |     |     |                 |
| ## 142 GmmNegV | 15B | 110 | 3 Adult (3 dpi) |
| Normoxia       |     |     |                 |
| ## 143 GmmNegV | 22A | 110 | 0 Pupae (0 dpi) |
| Normoxia       |     |     |                 |
| ## 144 GmmNegV | 22B | 110 | 0 Pupae (0 dpi) |
| Normoxia       |     |     |                 |



|                |     |     |                 |
|----------------|-----|-----|-----------------|
| ## 145 GmmNegV | 3A  | 110 | 0 Pupae (0 dpi) |
| Hypoxia        |     |     |                 |
| ## 146 GmmNegV | 3B  | 110 | 0 Pupae (0 dpi) |
| Hypoxia        |     |     |                 |
| ## 147 GmmNegV | 6A  | 110 | 0 Pupae (0 dpi) |
| Normoxia       |     |     |                 |
| ## 148 GmmNegV | 6B  | 110 | 0 Pupae (0 dpi) |
| Normoxia       |     |     |                 |
| ## 149 GmmNegV | 11A | 150 | 0 Pupae (0 dpi) |
| Hypoxia        |     |     |                 |
| ## 150 GmmNegV | 11B | 150 | 0 Pupae (0 dpi) |
| Hypoxia        |     |     |                 |
| ## 151 GmmNegV | 14A | 110 | 0 Pupae (0 dpi) |
| Normoxia       |     |     |                 |
| ## 152 GmmNegV | 14B | 110 | 0 Pupae (0 dpi) |
| Normoxia       |     |     |                 |
| ## 153 GmmNegV | 20A | 150 | 3 Adult (3 dpi) |
| Hypoxia        |     |     |                 |
| ## 154 GmmNegV | 20B | 150 | 3 Adult (3 dpi) |
| Hypoxia        |     |     |                 |
| ## 155 GmmNegV | 4A  | 110 | 3 Adult (3 dpi) |
| Hypoxia        |     |     |                 |
| ## 156 GmmNegV | 4B  | 110 | 3 Adult (3 dpi) |
| Hypoxia        |     |     |                 |
| ## 157 GmmNegV | 7A  | 110 | 3 Adult (3 dpi) |
| Normoxia       |     |     |                 |
| ## 158 GmmNegV | 7B  | 110 | 3 Adult (3 dpi) |
| Normoxia       |     |     |                 |
| ## 159 GmmNegV | 3A  | 110 | 0 Pupae (0 dpi) |
| Hypoxia        |     |     |                 |
| ## 160 GmmNegV | 3B  | 110 | 0 Pupae (0 dpi) |
| Hypoxia        |     |     |                 |
| ## 161 GmmNegV | 4A  | 110 | 3 Adult (3 dpi) |
| Normoxia       |     |     |                 |
| ## 162 GmmNegV | 4B  | 110 | 3 Adult (3 dpi) |
| Normoxia       |     |     |                 |
| ## 163 GmmNegV | 13A | 150 | 3 Adult (3 dpi) |
| Hypoxia        |     |     |                 |
| ## 164 GmmNegV | 13B | 150 | 3 Adult (3 dpi) |
| Hypoxia        |     |     |                 |
| ## 165 GmmNegV | 16A | 150 | 3 Adult (3 dpi) |
| Normoxia       |     |     |                 |
| ## 166 GmmNegV | 16B | 150 | 3 Adult (3 dpi) |
| Normoxia       |     |     |                 |
| ## 167 GmmNegV | 20A | 150 | 0 Pupae (0 dpi) |
| Hypoxia        |     |     |                 |
| ## 168 GmmNegV | 20B | 150 | 0 Pupae (0 dpi) |
| Hypoxia        |     |     |                 |
| ## 169 GmmNegV | 23A | 150 | 0 Pupae (0 dpi) |
| Normoxia       |     |     |                 |

|                |     |     |                 |
|----------------|-----|-----|-----------------|
| ## 170 GmmNegV | 23B | 150 | 0 Pupae (0 dpi) |
| Normoxia       |     |     |                 |
| ## 171 GmmNegV | 4A  | 150 | 0 Pupae (0 dpi) |
| Hypoxia        |     |     |                 |
| ## 172 GmmNegV | 4B  | 150 | 0 Pupae (0 dpi) |
| Hypoxia        |     |     |                 |
| ## 173 GmmNegV | 7A  | 150 | 0 Pupae (0 dpi) |
| Normoxia       |     |     |                 |
| ## 174 GmmNegV | 7B  | 150 | 0 Pupae (0 dpi) |
| Normoxia       |     |     |                 |
| ## 175 GmmNegV | 12A | 190 | 0 Pupae (0 dpi) |
| Hypoxia        |     |     |                 |
| ## 176 GmmNegV | 12B | 190 | 0 Pupae (0 dpi) |
| Hypoxia        |     |     |                 |
| ## 177 GmmNegV | 21A | 190 | 3 Adult (3 dpi) |
| Hypoxia        |     |     |                 |
| ## 178 GmmNegV | 21B | 190 | 3 Adult (3 dpi) |
| Hypoxia        |     |     |                 |
| ## 179 GmmNegV | 5A  | 150 | 3 Adult (3 dpi) |
| Hypoxia        |     |     |                 |
| ## 180 GmmNegV | 5B  | 150 | 3 Adult (3 dpi) |
| Hypoxia        |     |     |                 |
| ## 181 GmmNegV | 8A  | 150 | 3 Adult (3 dpi) |
| Normoxia       |     |     |                 |
| ## 182 GmmNegV | 8B  | 150 | 3 Adult (3 dpi) |
| Normoxia       |     |     |                 |
| ## 183 GmmNegV | 5A  | 150 | 3 Adult (3 dpi) |
| Normoxia       |     |     |                 |
| ## 184 GmmNegV | 5B  | 150 | 3 Adult (3 dpi) |
| Normoxia       |     |     |                 |
| ## 185 GmmNegV | 1A  | 0   | 0 Pupae (0 dpi) |
| Normoxia       |     |     |                 |
| ## 186 GmmNegV | 1B  | 0   | 0 Pupae (0 dpi) |
| Normoxia       |     |     |                 |

| ##    | Replicate | Expression | Mean.Cq  | Normalized_expression | Transformed |
|-------|-----------|------------|----------|-----------------------|-------------|
| ## 1  | 1         | 0.1090300  | 22.03000 | 0.46045991            | -0.80639449 |
| ## 2  | 1         | 0.1252000  | 22.18000 | 0.52874971            | -0.65798208 |
| ## 3  | 1         | 0.1346500  | 21.74000 | 0.56865933            | -0.58070931 |
| ## 4  | 1         | 0.1253500  | 21.86000 | 0.52938320            | -0.65670601 |
| ## 5  | 1         | 1.0128188  | 20.06000 | 3.09645293            | 1.06872315  |
| ## 6  | 1         | 0.9783009  | 20.14000 | 2.99092264            | 1.03769990  |
| ## 7  | 1         | 4.2774600  | 20.65000 | 13.07731817           | 2.26699785  |
| ## 8  | 1         | 0.2131900  | 24.97000 | 0.65177780            | -0.43734511 |
| ## 9  | 1         | 0.1312300  | 21.22000 | 0.55421585            | -0.60796567 |
| ## 10 | 1         | 0.0281800  | 23.20000 | 0.11901092            | -2.37204012 |
| ## 11 | 1         | 51.4884900 | 23.08000 | 217.44827590          | 4.16199580  |
| ## 12 | 1         | 35.4320700 | 23.73000 | 149.63815280          | 3.93967708  |
| ## 13 | 1         | 0.3535200  | 23.98000 | 1.08080345            | 0.07740358  |
| ## 14 | 1         | 0.5363300  | 23.34000 | 1.63970161            | 0.48248615  |
| ## 15 | 1         | 1.1104700  | 21.11000 | 3.39499832            | 1.15055481  |

|       |   |             |          |            |             |
|-------|---|-------------|----------|------------|-------------|
| ## 16 | 1 | 0.7600200   | 21.47000 | 2.32358067 | 0.80854586  |
| ## 17 | 1 | 0.1811900   | 21.22000 | 0.76520895 | -0.27121916 |
| ## 18 | 1 | 0.1300200   | 21.37000 | 0.54910573 | -0.61779662 |
| ## 19 | 1 | 0.1700800   | 20.48000 | 0.71828874 | -0.33641872 |
| ## 20 | 1 | 0.1377400   | 20.66000 | 0.58170915 | -0.55672992 |
| ## 21 | 1 | 1.0421000   | 21.21000 | 3.18597328 | 1.09414157  |
| ## 22 | 1 | 0.8134100   | 21.31000 | 2.48680791 | 0.87073579  |
| ## 23 | 1 | 0.3025000   | 22.33000 | 0.92482191 | -0.07846029 |
| ## 24 | 1 | 0.1771300   | 22.62000 | 0.54153291 | -0.63255198 |
| ## 25 | 1 | 0.1016900   | 21.38000 | 0.42946133 | -0.88197175 |
| ## 26 | 1 | 0.0811200   | 21.68000 | 0.34258927 | -1.13070376 |
| ## 27 | 1 | 0.0890500   | 22.69000 | 0.37607957 | -1.02737202 |
| ## 28 | 1 | 0.3971000   | 21.14000 | 1.21403895 | 0.19208399  |
| ## 29 | 1 | 0.2948100   | 21.36000 | 0.90131157 | -0.10444596 |
| ## 30 | 1 | 3.0791500   | 19.95000 | 9.41376991 | 2.00858578  |
| ## 31 | 1 | 0.9467200   | 20.14000 | 2.89437158 | 1.00824280  |
| ## 32 | 2 | 41.6958900  | 18.76000 | 1.52845712 | 0.41538497  |
| ## 33 | 2 | 44.1936500  | 18.90000 | 1.62001816 | 0.47098498  |
| ## 34 | 2 | 4.9830300   | 20.88000 | 0.18266423 | -1.85317370 |
| ## 35 | 2 | 4.0377800   | 21.10000 | 0.14801396 | -2.10513769 |
| ## 36 | 2 | 2.4963200   | 21.57000 | 1.12002369 | 0.11270985  |
| ## 37 | 2 | 2.4351600   | 21.58000 | 1.09258304 | 0.08815380  |
| ## 38 | 2 | 2.4411800   | 21.48000 | 1.09528403 | 0.09060080  |
| ## 39 | 2 | 1.7750200   | 21.63000 | 0.79639808 | -0.23026726 |
| ## 40 | 2 | 77.4999800  | 18.05000 | 2.84093700 | 0.99147185  |
| ## 41 | 2 | 89.1371500  | 18.02000 | 3.26752377 | 1.11662237  |
| ## 42 | 2 | 0.3540300   | 21.12000 | 0.15884261 | -2.01996763 |
| ## 43 | 2 | 0.2905300   | 21.09000 | 0.13035207 | -2.25993610 |
| ## 44 | 2 | 0.7990400   | 21.06000 | 0.35850521 | -1.08027279 |
| ## 45 | 2 | 0.5569800   | 21.31000 | 0.24990017 | -1.48744234 |
| ## 46 | 2 | 85.4123400  | 18.18000 | 3.13098244 | 1.07862208  |
| ## 47 | 2 | 51.9678200  | 18.22000 | 1.90499794 | 0.62415220  |
| ## 48 | 2 | 77.0431500  | 18.06000 | 2.82419086 | 0.98614442  |
| ## 49 | 2 | 70.0133600  | 18.17000 | 2.56649801 | 0.89948632  |
| ## 50 | 2 | 1.5843400   | 20.05000 | 0.71084570 | -0.34719100 |
| ## 51 | 2 | 1.4308200   | 19.84000 | 0.64196589 | -0.45318904 |
| ## 52 | 2 | 0.7566700   | 25.64000 | 0.33949507 | -1.14080706 |
| ## 53 | 2 | 0.4437700   | 25.93000 | 0.19910625 | -1.75145145 |
| ## 54 | 2 | 70.2479300  | 17.60000 | 2.57509671 | 0.90252972  |
| ## 55 | 2 | 54.1456100  | 17.67000 | 1.98482976 | 0.66256323  |
| ## 56 | 2 | 63.0303700  | 19.38000 | 2.31052073 | 0.80336367  |
| ## 57 | 2 | 55.6890600  | 19.66000 | 2.04140841 | 0.68877095  |
| ## 58 | 2 | 131.2552700 | 17.80000 | 4.81145869 | 1.45381433  |
| ## 59 | 2 | 103.3295600 | 18.06000 | 3.78777865 | 1.24690704  |
| ## 60 | 2 | 14.0394200  | 23.05000 | 6.29906542 | 1.68097579  |
| ## 61 | 2 | 8.8575800   | 23.14000 | 3.97412969 | 1.28884390  |
| ## 62 | 2 | 1.0936700   | 21.94000 | 0.49069683 | -0.73788318 |
| ## 63 | 2 | 0.7212700   | 21.90000 | 0.32361215 | -1.19431485 |
| ## 64 | 3 | 14.4368800  | 17.24000 | 1.32861836 | 0.28014077  |
| ## 65 | 3 | 13.5849800  | 17.28000 | 1.25021845 | 0.22084321  |

|        |   |            |          |             |             |
|--------|---|------------|----------|-------------|-------------|
| ## 66  | 3 | 9.0625900  | 17.96000 | 75.16455171 | 3.50769831  |
| ## 67  | 3 | 8.3693500  | 18.03000 | 69.41486274 | 3.45582728  |
| ## 68  | 3 | 11.9261400 | 19.77000 | 98.91465539 | 3.68353730  |
| ## 69  | 3 | 3.4096000  | 21.27000 | 28.27900805 | 2.84097988  |
| ## 70  | 3 | 5.3506800  | 18.51000 | 0.49242022  | -0.73411916 |
| ## 71  | 3 | 5.9361300  | 18.40000 | 0.54629887  | -0.62323942 |
| ## 72  | 3 | 5.9905200  | 17.58000 | 0.55130436  | -0.61355458 |
| ## 73  | 3 | 5.4069100  | 17.79000 | 0.49759504  | -0.72290345 |
| ## 74  | 3 | 0.5584300  | 20.94000 | 4.63158331  | 1.42118995  |
| ## 75  | 3 | 0.4598800  | 21.13000 | 3.81421581  | 1.25299301  |
| ## 76  | 3 | 0.2825900  | 19.52000 | 2.34378369  | 0.81649964  |
| ## 77  | 3 | 0.2831800  | 19.69000 | 2.34867712  | 0.81841480  |
| ## 78  | 3 | 11.0635400 | 18.09000 | 1.01817168  | 0.01799234  |
| ## 79  | 3 | 15.4973400 | 18.25000 | 1.42621193  | 0.34879382  |
| ## 80  | 3 | 7.1197500  | 18.13000 | 0.65522679  | -0.43183803 |
| ## 81  | 3 | 0.2620600  | 19.74000 | 2.17350917  | 0.74697251  |
| ## 82  | 3 | 0.2224400  | 20.03000 | 1.84490338  | 0.59405061  |
| ## 83  | 3 | 0.3690400  | 19.24000 | 3.06079456  | 1.05837233  |
| ## 84  | 3 | 0.2667800  | 19.50000 | 2.21265655  | 0.76347523  |
| ## 85  | 3 | 7.8034500  | 17.96000 | 0.71814734  | -0.33662223 |
| ## 86  | 3 | 3.7812600  | 18.02000 | 0.34798734  | -1.11331580 |
| ## 87  | 3 | 13.1375900 | 17.86000 | 1.20904539  | 0.18804067  |
| ## 88  | 3 | 13.0945400 | 17.75000 | 1.20508352  | 0.18481962  |
| ## 89  | 3 | 0.1813300  | 19.87000 | 1.50393962  | 0.39987341  |
| ## 90  | 3 | 0.1838700  | 20.09000 | 1.52500622  | 0.41321829  |
| ## 91  | 3 | 0.8061700  | 18.81000 | 6.68632330  | 1.73046170  |
| ## 92  | 3 | 0.4974200  | 19.22000 | 4.12557021  | 1.32136144  |
| ## 93  | 1 | 0.8102000  | 26.68000 | 5.20627169  | 1.52094764  |
| ## 94  | 1 | 0.7363400  | 26.76000 | 4.73165403  | 1.43950847  |
| ## 95  | 1 | 0.5395100  | 26.91000 | 3.46684231  | 1.16906697  |
| ## 96  | 1 | 0.4863700  | 27.07000 | 3.12536949  | 1.07702116  |
| ## 97  | 1 | 0.8843100  | 27.01000 | 0.26036264  | -1.44042433 |
| ## 98  | 1 | 1.1734000  | 26.50000 | 0.34547786  | -1.12136202 |
| ## 99  | 1 | 2.6828300  | 28.13000 | 0.78989122  | -0.23866353 |
| ## 100 | 1 | 4.7126700  | 28.02000 | 1.38752611  | 0.32221692  |
| ## 101 | 3 | 10.7132300 | 24.32000 | 2.31479499  | 0.80506324  |
| ## 102 | 3 | 8.7765400  | 24.43000 | 1.89633666  | 0.61987867  |
| ## 103 | 3 | 1.0089800  | 27.78000 | 5.75491231  | 1.60547496  |
| ## 104 | 3 | 0.9038900  | 28.06000 | 5.15551119  | 1.51263603  |
| ## 105 | 3 | 0.6253100  | 25.68000 | 3.56657636  | 1.19407774  |
| ## 106 | 3 | 0.4556300  | 25.73000 | 2.59877371  | 0.91085245  |
| ## 107 | 2 | 1.4848600  | 26.97000 | 0.06325263  | -3.17929376 |
| ## 108 | 2 | 1.4112400  | 26.96000 | 0.06011654  | -3.24648346 |
| ## 109 | 2 | 1.8656500  | 26.34000 | 0.33823712  | -1.14494355 |
| ## 110 | 2 | 1.6668200  | 26.47000 | 0.30218980  | -1.27124838 |
| ## 111 | 2 | 1.1214100  | 26.94000 | 0.20330849  | -1.72693311 |
| ## 112 | 2 | 1.0658700  | 26.71000 | 0.19323925  | -1.78665215 |
| ## 113 | 3 | 5.4109400  | 25.25000 | 30.86234137 | 2.90328911  |
| ## 114 | 3 | 4.8051100  | 25.12000 | 27.40687295 | 2.81851841  |
| ## 115 | 1 | 0.2189000  | 27.03000 | 1.40663154  | 0.33544271  |

|        |   |             |          |              |             |
|--------|---|-------------|----------|--------------|-------------|
| ## 116 | 1 | 0.2003100   | 27.24000 | 1.28717389   | 0.24928915  |
| ## 117 | 1 | 118.9140500 | 28.95000 | 764.13089580 | 4.85147028  |
| ## 118 | 1 | 105.1212000 | 29.33000 | 675.49929310 | 4.78760271  |
| ## 119 | 2 | 42.6129100  | 26.04000 | 1.81524102   | 0.57879247  |
| ## 120 | 2 | 43.9302600  | 26.02000 | 1.87135800   | 0.60743277  |
| ## 121 | 1 | 1.1265200   | 29.92000 | 0.33167523   | -1.16679892 |
| ## 122 | 1 | 0.9836700   | 29.74000 | 0.28961667   | -1.31924979 |
| ## 123 | 1 | 11.2072300  | 25.01000 | 3.29968452   | 1.12531886  |
| ## 124 | 1 | 7.8449400   | 25.13000 | 2.30974354   | 0.80305427  |
| ## 125 | 3 | 2.4951400   | 27.69000 | 0.53912196   | -0.63729731 |
| ## 126 | 3 | 0.6102700   | 27.92000 | 0.13186032   | -2.24584019 |
| ## 127 | 3 | 9.2634100   | 23.79000 | 2.00153409   | 0.67038546  |
| ## 128 | 3 | 4.9444100   | 24.38000 | 1.06833285   | 0.06588137  |
| ## 129 | 3 | 11.9216400  | 25.73000 | 67.99737630  | 3.44231148  |
| ## 130 | 3 | 1.8955200   | 25.77000 | 10.81146442  | 2.11845159  |
| ## 131 | 3 | 0.2362600   | 26.01000 | 1.34755454   | 0.29388652  |
| ## 132 | 3 | 0.1822200   | 26.73000 | 1.03932696   | 0.03849905  |
| ## 133 | 2 | 1.0139200   | 25.99000 | 0.18382086   | -1.84569432 |
| ## 134 | 2 | 0.9682700   | 25.82000 | 0.17554464   | -1.90039133 |
| ## 135 | 2 | 2.0803000   | 26.05000 | 0.37715256   | -1.02423071 |
| ## 136 | 2 | 1.8040700   | 26.21000 | 0.32707284   | -1.18241362 |
| ## 137 | 2 | 118.9116100 | 24.16000 | 5.06544219   | 1.49766400  |
| ## 138 | 2 | 68.6617600  | 24.27000 | 2.92487988   | 1.01766607  |
| ## 139 | 1 | 0.7697600   | 26.10000 | 4.94640792   | 1.47742156  |
| ## 140 | 1 | 0.6476200   | 26.37000 | 4.16154736   | 1.32889359  |
| ## 141 | 1 | 0.2797500   | 26.65000 | 1.79764812   | 0.56961265  |
| ## 142 | 1 | 0.2673800   | 26.72000 | 1.71815962   | 0.52686668  |
| ## 143 | 2 | 54.4506800  | 25.55000 | 2.31951087   | 0.80693441  |
| ## 144 | 2 | 48.5452000  | 25.79000 | 2.06794697   | 0.70078990  |
| ## 145 | 1 | 11.1907100  | 25.10000 | 3.29482063   | 1.12400963  |
| ## 146 | 1 | 13.0064500  | 24.81000 | 3.82941920   | 1.25647192  |
| ## 147 | 1 | 1.2239900   | 26.97000 | 0.36037280   | -1.07451714 |
| ## 148 | 1 | 1.0268300   | 27.19000 | 0.30232404   | -1.27074779 |
| ## 149 | 3 | 17.6618300  | 24.45000 | 3.81617081   | 1.25344121  |
| ## 150 | 3 | 11.8749900  | 24.66000 | 2.56581510   | 0.89924413  |
| ## 151 | 3 | 0.3052100   | 29.31000 | 0.06594637   | -3.12444399 |
| ## 152 | 3 | 0.8055700   | 28.08000 | 0.17405856   | -1.91051283 |
| ## 153 | 3 | 1.2146200   | 25.03000 | 6.92781976   | 1.75975087  |
| ## 154 | 3 | 0.4163500   | 25.54000 | 2.37473264   | 0.82853891  |
| ## 155 | 2 | 2.0482300   | 25.96000 | 0.37133836   | -1.04137139 |
| ## 156 | 2 | 2.1100900   | 25.84000 | 0.38255341   | -1.00856706 |
| ## 157 | 2 | 0.2268300   | 33.84000 | 0.04112364   | -3.75912578 |
| ## 158 | 2 | 0.1342400   | 33.91000 | 0.02433734   | -4.50015672 |
| ## 159 | 2 | 35.6770200  | 25.03000 | 1.51978333   | 0.40992878  |
| ## 160 | 2 | 25.7247600  | 25.20000 | 1.09583315   | 0.09109747  |
| ## 161 | 3 | 0.2381900   | 26.33000 | 1.35856267   | 0.30177999  |
| ## 162 | 3 | 0.1865100   | 26.48000 | 1.06379581   | 0.06165263  |
| ## 163 | 1 | 0.5453500   | 25.99000 | 3.50436962   | 1.17856965  |
| ## 164 | 1 | 0.4553800   | 26.18000 | 2.92623056   | 1.01808076  |
| ## 165 | 1 | 0.6008200   | 27.23000 | 3.86081480   | 1.26360819  |

```

## 166      1  0.5227800 27.15000      3.35933685  1.14120515
## 167      2 106.8144500 26.32000      4.55012275  1.40595371
## 168      2  74.9821900 26.55000      3.19411998  1.09641565
## 169      2 101.2498400 25.20000      4.31307937  1.35985054
## 170      2 111.2807100 25.17000      4.74037820  1.44108525
## 171      1  0.6616200 27.27000      0.19479722 -1.77719115
## 172      1  0.5530500 26.96000      0.16283154 -1.99019225
## 173      1  3.0770200 25.60000      0.90595047 -0.09926004
## 174      1  2.6007700 25.51000      0.76573074 -0.27051903
## 175      3  6.3921000 25.01000      1.38113352  0.31774685
## 176      3  4.6987000 25.00000      1.01524258  0.01511614
## 177      3  0.2544100 25.98000      1.45107657  0.36546038
## 178      3  0.3049500 26.03000      1.73934122  0.53846673
## 179      2 31.8433400 28.23000      5.77310837  1.60812456
## 180      2 19.2974000 28.22000      3.49856458  1.17710704
## 181      2  5.6814612 26.98748      1.03003300  0.02954710
## 182      2  6.5011374 27.14410      1.17863801  0.16301621
## 183      3  1.1308500 24.78000      6.45002139  1.70065374
## 184      3  0.7980400 25.00000      4.55177527  1.40626577
## 185      2 37.9748200 25.58000      1.61766589  0.46960025
## 186      2 35.9224600 25.59000      1.53023867  0.41650142

```

```

# check for normality of the data

```

```

Box=boxcox(Normalized_expression~1, lambda = seq(-35,15,0.1))

```

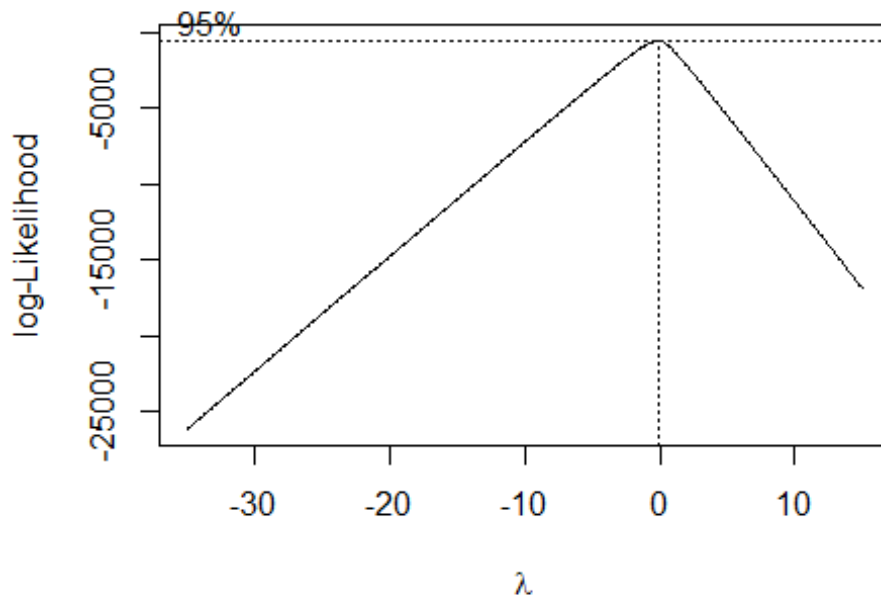

```

Cox = data.frame(Box$x, Box$y)
Cox2 = Cox[with(Cox, order(-Cox$Box.y)),]
Cox2[1,]

##      Box.x      Box.y
## 350   -0.1 -565.2725

lambda = Cox2[1, "Box.x"]
lambda

## [1] -0.1

Transformed = (Normalized_expression ^ lambda - 1)/lambda
Transformed

##   [1] -0.80639449 -0.65798208 -0.58070931 -0.65670601  1.06872315
##      1.03769990
##   [7]  2.26699785 -0.43734511 -0.60796568 -2.37204013  4.16199580
##      3.93967708
##  [13]  0.07740358  0.48248615  1.15055481  0.80854586 -0.27121916 -
##      0.61779662
##  [19] -0.33641872 -0.55672992  1.09414157  0.87073579 -0.07846029 -
##      0.63255198
##  [25] -0.88197175 -1.13070376 -1.02737202  0.19208399 -0.10444596
##      2.00858578
##  [31]  1.00824280  0.41538497  0.47098498 -1.85317370 -2.10513769
##      0.11270985
##  [37]  0.08815380  0.09060080 -0.23026726  0.99147185  1.11662237 -
##      2.01996763
##  [43] -2.25993610 -1.08027279 -1.48744234  1.07862208  0.62415220
##      0.98614442
##  [49]  0.89948632 -0.34719100 -0.45318904 -1.14080706 -1.75145145
##      0.90252972
##  [55]  0.66256323  0.80336367  0.68877095  1.45381433  1.24690704
##      1.68097579
##  [61]  1.28884390 -0.73788318 -1.19431485  0.28014077  0.22084321
##      3.50769831
##  [67]  3.45582728  3.68353730  2.84097988 -0.73411916 -0.62323942 -
##      0.61355458
##  [73] -0.72290345  1.42118995  1.25299301  0.81649964  0.81841480
##      0.01799234
##  [79]  0.34879382 -0.43183803  0.74697251  0.59405061  1.05837233
##      0.76347523
##  [85] -0.33662223 -1.11331580  0.18804067  0.18481962  0.39987341
##      0.41321829
##  [91]  1.73046170  1.32136144  1.52094764  1.43950847  1.16906697
##      1.07702116
##  [97] -1.44042433 -1.12136202 -0.23866353  0.32221692  0.80506324
##      0.61987867
## [103]  1.60547496  1.51263603  1.19407774  0.91085245 -3.17929376 -
##      3.24648346

```

```
## [109] -1.14494355 -1.27124838 -1.72693311 -1.78665215 2.90328911
2.81851841
## [115] 0.33544271 0.24928915 4.85147028 4.78760271 0.57879247
0.60743277
## [121] -1.16679892 -1.31924979 1.12531886 0.80305427 -0.63729731 -
2.24584019
## [127] 0.67038546 0.06588137 3.44231148 2.11845159 0.29388652
0.03849905
## [133] -1.84569432 -1.90039133 -1.02423071 -1.18241362 1.49766400
1.01766607
## [139] 1.47742156 1.32889359 0.56961265 0.52686668 0.80693441
0.70078990
## [145] 1.12400963 1.25647192 -1.07451714 -1.27074779 1.25344121
0.89924413
## [151] -3.12444399 -1.91051283 1.75975087 0.82853891 -1.04137139 -
1.00856706
## [157] -3.75912578 -4.50015672 0.40992878 0.09109747 0.30177999
0.06165263
## [163] 1.17856965 1.01808076 1.26360819 1.14120515 1.40595371
1.09641565
## [169] 1.35985054 1.44108525 -1.77719115 -1.99019225 -0.09926004 -
0.27051903
## [175] 0.31774685 0.01511614 0.36546038 0.53846673 1.60812456
1.17710704
## [181] 0.02954710 0.16301621 1.70065374 1.40626577 0.46960025
0.41650142
```

```
expression <- with(qpcr,Normalized_expression)
trans <- with(qpcr,Transformed)
library(rcompanion)
```

```
plotNormalHistogram(Normalized_expression)
```



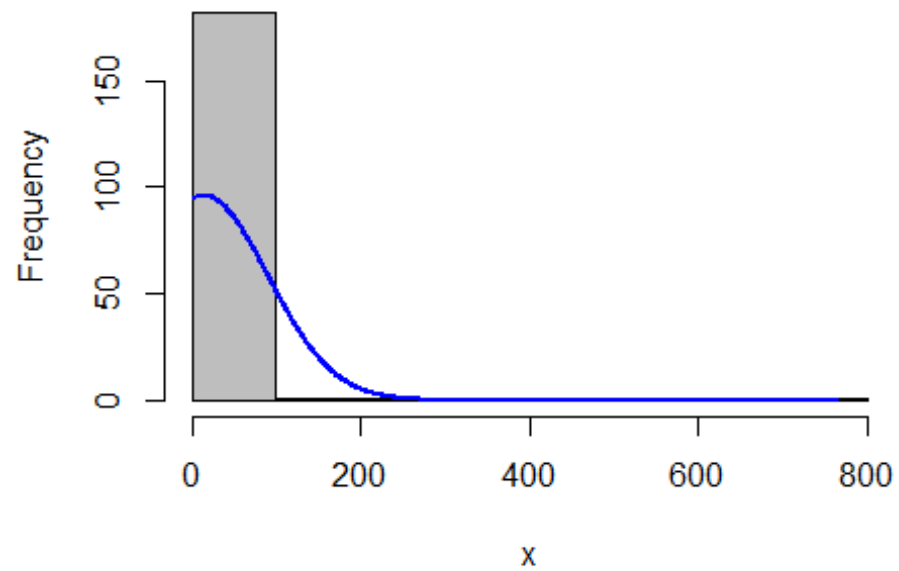

```
qqnorm(Normalized_expression,ylab="Normalized_expression")
qqline(Normalized_expression,
       col="red")
```

### Normal Q-Q Plot

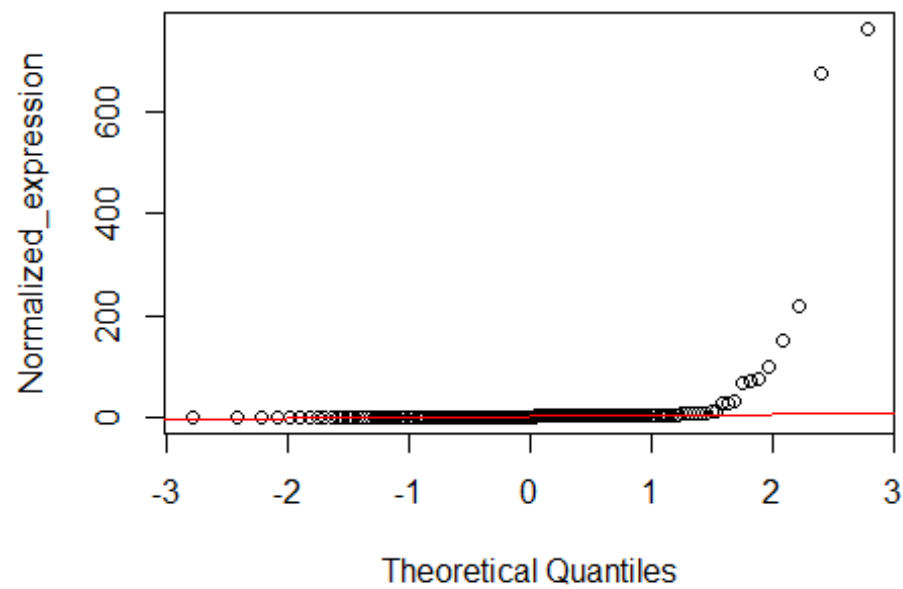

```
plotNormalHistogram(Transformed)
```

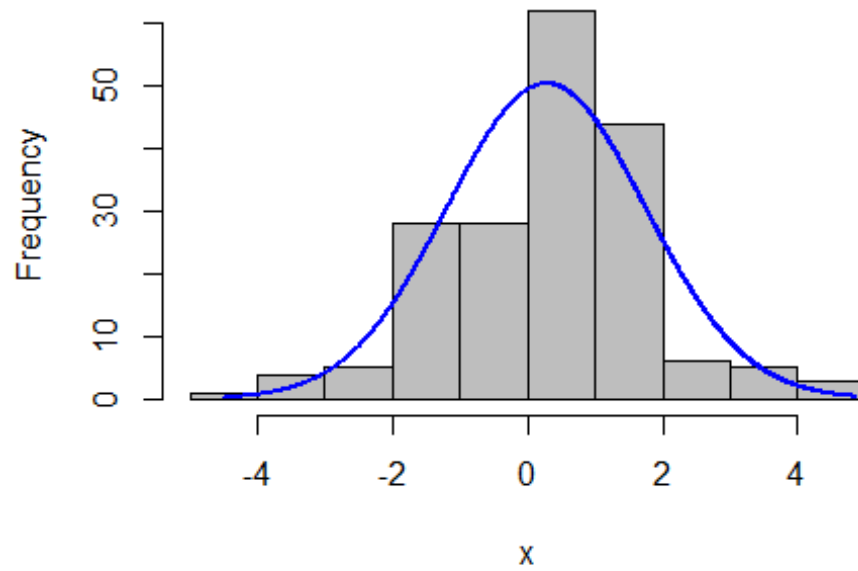

```
qqnorm(Transformed,ylab="Transneg_expression")  
qqline(Transformed,  
        col="red")
```

## Normal Q-Q Plot

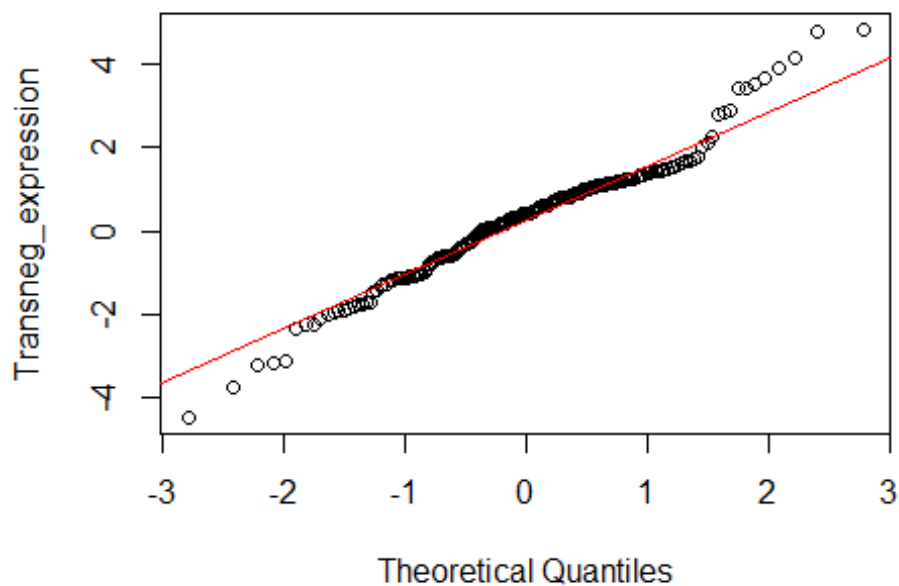

```
#-----
#=====
=====

ifla<-subset(qpcr, Target=="GmmIV")
ifla

##      Target Sample Irradiation_dose Dpi    Life_stage
Irradiation_conditions
## 1   GmmIV    17A                0   3 Adult (3 dpi)
Hypoxia
## 2   GmmIV    17B                0   3 Adult (3 dpi)
Hypoxia
## 3   GmmIV    18A                0   3 Adult (3 dpi)
Normoxia
## 4   GmmIV    18B                0   3 Adult (3 dpi)
Normoxia
## 5   GmmIV     8A                0   0 Pupae (0 dpi)
Hypoxia
## 6   GmmIV     8B                0   0 Pupae (0 dpi)
Hypoxia
## 7   GmmIV     9A                0   0 Pupae (0 dpi)
Normoxia
## 8   GmmIV     9B                0   0 Pupae (0 dpi)
Normoxia
## 9   GmmIV    11A               70   3 Adult (3 dpi)
```

|          |       |     |     |                 |  |
|----------|-------|-----|-----|-----------------|--|
| Hypoxia  |       |     |     |                 |  |
| ## 10    | GmmIV | 11B | 70  | 3 Adult (3 dpi) |  |
| Hypoxia  |       |     |     |                 |  |
| ## 11    | GmmIV | 14A | 70  | 3 Adult (3 dpi) |  |
| Normoxia |       |     |     |                 |  |
| ## 12    | GmmIV | 14B | 70  | 3 Adult (3 dpi) |  |
| Normoxia |       |     |     |                 |  |
| ## 13    | GmmIV | 2A  | 70  | 0 Pupae (0 dpi) |  |
| Hypoxia  |       |     |     |                 |  |
| ## 14    | GmmIV | 2B  | 70  | 0 Pupae (0 dpi) |  |
| Hypoxia  |       |     |     |                 |  |
| ## 15    | GmmIV | 5A  | 70  | 0 Pupae (0 dpi) |  |
| Normoxia |       |     |     |                 |  |
| ## 16    | GmmIV | 5B  | 70  | 0 Pupae (0 dpi) |  |
| Normoxia |       |     |     |                 |  |
| ## 17    | GmmIV | 12A | 110 | 3 Adult (3 dpi) |  |
| Hypoxia  |       |     |     |                 |  |
| ## 18    | GmmIV | 12B | 110 | 3 Adult (3 dpi) |  |
| Hypoxia  |       |     |     |                 |  |
| ## 19    | GmmIV | 15A | 110 | 3 Adult (3 dpi) |  |
| Normoxia |       |     |     |                 |  |
| ## 20    | GmmIV | 15B | 110 | 3 Adult (3 dpi) |  |
| Normoxia |       |     |     |                 |  |
| ## 21    | GmmIV | 3A  | 110 | 0 Pupae (0 dpi) |  |
| Hypoxia  |       |     |     |                 |  |
| ## 22    | GmmIV | 3B  | 110 | 0 Pupae (0 dpi) |  |
| Hypoxia  |       |     |     |                 |  |
| ## 23    | GmmIV | 6A  | 110 | 0 Pupae (0 dpi) |  |
| Normoxia |       |     |     |                 |  |
| ## 24    | GmmIV | 6B  | 110 | 0 Pupae (0 dpi) |  |
| Normoxia |       |     |     |                 |  |
| ## 25    | GmmIV | 13A | 150 | 3 Adult (3 dpi) |  |
| Hypoxia  |       |     |     |                 |  |
| ## 26    | GmmIV | 13B | 150 | 3 Adult (3 dpi) |  |
| Hypoxia  |       |     |     |                 |  |
| ## 27    | GmmIV | 16B | 150 | 3 Adult (3 dpi) |  |
| Normoxia |       |     |     |                 |  |
| ## 28    | GmmIV | 4A  | 150 | 0 Pupae (0 dpi) |  |
| Hypoxia  |       |     |     |                 |  |
| ## 29    | GmmIV | 4B  | 150 | 0 Pupae (0 dpi) |  |
| Hypoxia  |       |     |     |                 |  |
| ## 30    | GmmIV | 7A  | 150 | 0 Pupae (0 dpi) |  |
| Normoxia |       |     |     |                 |  |
| ## 31    | GmmIV | 7B  | 150 | 0 Pupae (0 dpi) |  |
| Normoxia |       |     |     |                 |  |
| ## 32    | GmmIV | 1A  | 0   | 0 Pupae (0 dpi) |  |
| Normoxia |       |     |     |                 |  |
| ## 33    | GmmIV | 1B  | 0   | 0 Pupae (0 dpi) |  |
| Normoxia |       |     |     |                 |  |
| ## 34    | GmmIV | 1A  | 0   | 0 Pupae (0 dpi) |  |

|          |       |     |     |                 |
|----------|-------|-----|-----|-----------------|
| Hypoxia  |       |     |     |                 |
| ## 35    | GmmIV | 1b  | 0   | 0 Pupae (0 dpi) |
| Hypoxia  |       |     |     |                 |
| ## 36    | GmmIV | 2a  | 0   | 3 Adult (3 dpi) |
| Hypoxia  |       |     |     |                 |
| ## 37    | GmmIV | 2b  | 0   | 3 Adult (3 dpi) |
| Hypoxia  |       |     |     |                 |
| ## 38    | GmmIV | 3a  | 0   | 3 Adult (3 dpi) |
| Normoxia |       |     |     |                 |
| ## 39    | GmmIV | 3b  | 0   | 3 Adult (3 dpi) |
| Normoxia |       |     |     |                 |
| ## 40    | GmmIV | 21A | 70  | 0 Pupae (0 dpi) |
| Normoxia |       |     |     |                 |
| ## 41    | GmmIV | 21B | 70  | 0 Pupae (0 dpi) |
| Normoxia |       |     |     |                 |
| ## 42    | GmmIV | 3A  | 70  | 3 Adult (3 dpi) |
| Hypoxia  |       |     |     |                 |
| ## 43    | GmmIV | 3B  | 70  | 3 Adult (3 dpi) |
| Hypoxia  |       |     |     |                 |
| ## 44    | GmmIV | 6A  | 70  | 3 Adult (3 dpi) |
| Normoxia |       |     |     |                 |
| ## 45    | GmmIV | 6B  | 70  | 3 Adult (3 dpi) |
| Normoxia |       |     |     |                 |
| ## 46    | GmmIV | 2A  | 70  | 0 Pupae (0 dpi) |
| Hypoxia  |       |     |     |                 |
| ## 47    | GmmIV | 2B  | 70  | 0 Pupae (0 dpi) |
| Hypoxia  |       |     |     |                 |
| ## 48    | GmmIV | 22A | 110 | 0 Pupae (0 dpi) |
| Normoxia |       |     |     |                 |
| ## 49    | GmmIV | 22B | 110 | 0 Pupae (0 dpi) |
| Normoxia |       |     |     |                 |
| ## 50    | GmmIV | 4A  | 110 | 3 Adult (3 dpi) |
| Hypoxia  |       |     |     |                 |
| ## 51    | GmmIV | 4B  | 110 | 3 Adult (3 dpi) |
| Hypoxia  |       |     |     |                 |
| ## 52    | GmmIV | 7A  | 110 | 3 Adult (3 dpi) |
| Normoxia |       |     |     |                 |
| ## 53    | GmmIV | 7B  | 110 | 3 Adult (3 dpi) |
| Normoxia |       |     |     |                 |
| ## 54    | GmmIV | 3A  | 110 | 0 Pupae (0 dpi) |
| Hypoxia  |       |     |     |                 |
| ## 55    | GmmIV | 3B  | 110 | 0 Pupae (0 dpi) |
| Hypoxia  |       |     |     |                 |
| ## 56    | GmmIV | 20A | 150 | 0 Pupae (0 dpi) |
| Hypoxia  |       |     |     |                 |
| ## 57    | GmmIV | 20B | 150 | 0 Pupae (0 dpi) |
| Hypoxia  |       |     |     |                 |
| ## 58    | GmmIV | 23A | 150 | 0 Pupae (0 dpi) |
| Normoxia |       |     |     |                 |
| ## 59    | GmmIV | 23B | 150 | 0 Pupae (0 dpi) |

|          |       |     |     |                 |
|----------|-------|-----|-----|-----------------|
| Normoxia |       |     |     |                 |
| ## 60    | GmmIV | 5A  | 150 | 3 Adult (3 dpi) |
| Hypoxia  |       |     |     |                 |
| ## 61    | GmmIV | 5B  | 150 | 3 Adult (3 dpi) |
| Hypoxia  |       |     |     |                 |
| ## 62    | GmmIV | 8A  | 150 | 3 Adult (3 dpi) |
| Normoxia |       |     |     |                 |
| ## 63    | GmmIV | 8B  | 150 | 3 Adult (3 dpi) |
| Normoxia |       |     |     |                 |
| ## 64    | GmmIV | 16A | 0   | 0 Pupae (0 dpi) |
| Hypoxia  |       |     |     |                 |
| ## 65    | GmmIV | 16B | 0   | 0 Pupae (0 dpi) |
| Hypoxia  |       |     |     |                 |
| ## 66    | GmmIV | 17A | 0   | 3 Adult (3 dpi) |
| Normoxia |       |     |     |                 |
| ## 67    | GmmIV | 17B | 0   | 3 Adult (3 dpi) |
| Normoxia |       |     |     |                 |
| ## 68    | GmmIV | 4a  | 0   | 3 Adult (3 dpi) |
| Hypoxia  |       |     |     |                 |
| ## 69    | GmmIV | 4b  | 0   | 3 Adult (3 dpi) |
| Hypoxia  |       |     |     |                 |
| ## 70    | GmmIV | 10A | 110 | 0 Pupae (0 dpi) |
| Hypoxia  |       |     |     |                 |
| ## 71    | GmmIV | 10B | 110 | 0 Pupae (0 dpi) |
| Hypoxia  |       |     |     |                 |
| ## 72    | GmmIV | 13A | 70  | 0 Pupae (0 dpi) |
| Normoxia |       |     |     |                 |
| ## 73    | GmmIV | 13B | 70  | 0 Pupae (0 dpi) |
| Normoxia |       |     |     |                 |
| ## 74    | GmmIV | 19A | 110 | 3 Adult (3 dpi) |
| Hypoxia  |       |     |     |                 |
| ## 75    | GmmIV | 19B | 110 | 3 Adult (3 dpi) |
| Hypoxia  |       |     |     |                 |
| ## 76    | GmmIV | 22A | 70  | 3 Adult (3 dpi) |
| Normoxia |       |     |     |                 |
| ## 77    | GmmIV | 22B | 70  | 3 Adult (3 dpi) |
| Normoxia |       |     |     |                 |
| ## 78    | GmmIV | 11A | 150 | 0 Pupae (0 dpi) |
| Hypoxia  |       |     |     |                 |
| ## 79    | GmmIV | 14A | 110 | 0 Pupae (0 dpi) |
| Normoxia |       |     |     |                 |
| ## 80    | GmmIV | 14B | 110 | 0 Pupae (0 dpi) |
| Normoxia |       |     |     |                 |
| ## 81    | GmmIV | 20A | 150 | 3 Adult (3 dpi) |
| Hypoxia  |       |     |     |                 |
| ## 82    | GmmIV | 20B | 150 | 3 Adult (3 dpi) |
| Hypoxia  |       |     |     |                 |
| ## 83    | GmmIV | 4A  | 110 | 3 Adult (3 dpi) |
| Normoxia |       |     |     |                 |
| ## 84    | GmmIV | 4B  | 110 | 3 Adult (3 dpi) |

|          |           |            |         |                       |             |  |
|----------|-----------|------------|---------|-----------------------|-------------|--|
| Normoxia |           |            |         |                       |             |  |
| ## 85    | GmmIV     | 12A        | 190     | 0 Pupae (0 dpi)       |             |  |
| Hypoxia  |           |            |         |                       |             |  |
| ## 86    | GmmIV     | 12B        | 190     | 0 Pupae (0 dpi)       |             |  |
| Hypoxia  |           |            |         |                       |             |  |
| ## 87    | GmmIV     | 15A        | 150     | 0 Pupae (0 dpi)       |             |  |
| Normoxia |           |            |         |                       |             |  |
| ## 88    | GmmIV     | 15B        | 150     | 0 Pupae (0 dpi)       |             |  |
| Normoxia |           |            |         |                       |             |  |
| ## 89    | GmmIV     | 21A        | 190     | 3 Adult (3 dpi)       |             |  |
| Hypoxia  |           |            |         |                       |             |  |
| ## 90    | GmmIV     | 21B        | 190     | 3 Adult (3 dpi)       |             |  |
| Hypoxia  |           |            |         |                       |             |  |
| ## 91    | GmmIV     | 5A         | 150     | 3 Adult (3 dpi)       |             |  |
| Normoxia |           |            |         |                       |             |  |
| ## 92    | GmmIV     | 5B         | 150     | 3 Adult (3 dpi)       |             |  |
| Normoxia |           |            |         |                       |             |  |
| ##       | Replicate | Expression | Mean.Cq | Normalized_expression | Transformed |  |
| ## 1     | 1         | 0.1090300  | 22.03   | 0.4604599             | -0.80639449 |  |
| ## 2     | 1         | 0.1252000  | 22.18   | 0.5287497             | -0.65798208 |  |
| ## 3     | 1         | 0.1346500  | 21.74   | 0.5686593             | -0.58070931 |  |
| ## 4     | 1         | 0.1253500  | 21.86   | 0.5293832             | -0.65670601 |  |
| ## 5     | 1         | 1.0128188  | 20.06   | 3.0964529             | 1.06872315  |  |
| ## 6     | 1         | 0.9783009  | 20.14   | 2.9909226             | 1.03769990  |  |
| ## 7     | 1         | 4.2774600  | 20.65   | 13.0773182            | 2.26699785  |  |
| ## 8     | 1         | 0.2131900  | 24.97   | 0.6517778             | -0.43734511 |  |
| ## 9     | 1         | 0.1312300  | 21.22   | 0.5542158             | -0.60796567 |  |
| ## 10    | 1         | 0.0281800  | 23.20   | 0.1190109             | -2.37204012 |  |
| ## 11    | 1         | 51.4884900 | 23.08   | 217.4482759           | 4.16199580  |  |
| ## 12    | 1         | 35.4320700 | 23.73   | 149.6381528           | 3.93967708  |  |
| ## 13    | 1         | 0.3535200  | 23.98   | 1.0808034             | 0.07740358  |  |
| ## 14    | 1         | 0.5363300  | 23.34   | 1.6397016             | 0.48248615  |  |
| ## 15    | 1         | 1.1104700  | 21.11   | 3.3949983             | 1.15055481  |  |
| ## 16    | 1         | 0.7600200  | 21.47   | 2.3235807             | 0.80854586  |  |
| ## 17    | 1         | 0.1811900  | 21.22   | 0.7652089             | -0.27121916 |  |
| ## 18    | 1         | 0.1300200  | 21.37   | 0.5491057             | -0.61779662 |  |
| ## 19    | 1         | 0.1700800  | 20.48   | 0.7182887             | -0.33641872 |  |
| ## 20    | 1         | 0.1377400  | 20.66   | 0.5817091             | -0.55672992 |  |
| ## 21    | 1         | 1.0421000  | 21.21   | 3.1859733             | 1.09414157  |  |
| ## 22    | 1         | 0.8134100  | 21.31   | 2.4868079             | 0.87073579  |  |
| ## 23    | 1         | 0.3025000  | 22.33   | 0.9248219             | -0.07846029 |  |
| ## 24    | 1         | 0.1771300  | 22.62   | 0.5415329             | -0.63255198 |  |
| ## 25    | 1         | 0.1016900  | 21.38   | 0.4294613             | -0.88197175 |  |
| ## 26    | 1         | 0.0811200  | 21.68   | 0.3425893             | -1.13070376 |  |
| ## 27    | 1         | 0.0890500  | 22.69   | 0.3760796             | -1.02737202 |  |
| ## 28    | 1         | 0.3971000  | 21.14   | 1.2140389             | 0.19208399  |  |
| ## 29    | 1         | 0.2948100  | 21.36   | 0.9013116             | -0.10444596 |  |
| ## 30    | 1         | 3.0791500  | 19.95   | 9.4137699             | 2.00858578  |  |
| ## 31    | 1         | 0.9467200  | 20.14   | 2.8943716             | 1.00824280  |  |
| ## 32    | 2         | 41.6958900 | 18.76   | 1.5284571             | 0.41538497  |  |

|       |   |             |       |            |             |
|-------|---|-------------|-------|------------|-------------|
| ## 33 | 2 | 44.1936500  | 18.90 | 1.6200182  | 0.47098498  |
| ## 34 | 2 | 4.9830300   | 20.88 | 0.1826642  | -1.85317370 |
| ## 35 | 2 | 4.0377800   | 21.10 | 0.1480140  | -2.10513769 |
| ## 36 | 2 | 2.4963200   | 21.57 | 1.1200237  | 0.11270985  |
| ## 37 | 2 | 2.4351600   | 21.58 | 1.0925830  | 0.08815380  |
| ## 38 | 2 | 2.4411800   | 21.48 | 1.0952840  | 0.09060080  |
| ## 39 | 2 | 1.7750200   | 21.63 | 0.7963981  | -0.23026726 |
| ## 40 | 2 | 77.4999800  | 18.05 | 2.8409370  | 0.99147185  |
| ## 41 | 2 | 89.1371500  | 18.02 | 3.2675238  | 1.11662237  |
| ## 42 | 2 | 0.3540300   | 21.12 | 0.1588426  | -2.01996763 |
| ## 43 | 2 | 0.2905300   | 21.09 | 0.1303521  | -2.25993610 |
| ## 44 | 2 | 0.7990400   | 21.06 | 0.3585052  | -1.08027279 |
| ## 45 | 2 | 0.5569800   | 21.31 | 0.2499002  | -1.48744234 |
| ## 46 | 2 | 85.4123400  | 18.18 | 3.1309824  | 1.07862208  |
| ## 47 | 2 | 51.9678200  | 18.22 | 1.9049979  | 0.62415220  |
| ## 48 | 2 | 77.0431500  | 18.06 | 2.8241909  | 0.98614442  |
| ## 49 | 2 | 70.0133600  | 18.17 | 2.5664980  | 0.89948632  |
| ## 50 | 2 | 1.5843400   | 20.05 | 0.7108457  | -0.34719100 |
| ## 51 | 2 | 1.4308200   | 19.84 | 0.6419659  | -0.45318904 |
| ## 52 | 2 | 0.7566700   | 25.64 | 0.3394951  | -1.14080706 |
| ## 53 | 2 | 0.4437700   | 25.93 | 0.1991063  | -1.75145145 |
| ## 54 | 2 | 70.2479300  | 17.60 | 2.5750967  | 0.90252972  |
| ## 55 | 2 | 54.1456100  | 17.67 | 1.9848298  | 0.66256323  |
| ## 56 | 2 | 63.0303700  | 19.38 | 2.3105207  | 0.80336367  |
| ## 57 | 2 | 55.6890600  | 19.66 | 2.0414084  | 0.68877095  |
| ## 58 | 2 | 131.2552700 | 17.80 | 4.8114587  | 1.45381433  |
| ## 59 | 2 | 103.3295600 | 18.06 | 3.7877787  | 1.24690704  |
| ## 60 | 2 | 14.0394200  | 23.05 | 6.2990654  | 1.68097579  |
| ## 61 | 2 | 8.8575800   | 23.14 | 3.9741297  | 1.28884390  |
| ## 62 | 2 | 1.0936700   | 21.94 | 0.4906968  | -0.73788318 |
| ## 63 | 2 | 0.7212700   | 21.90 | 0.3236122  | -1.19431485 |
| ## 64 | 3 | 14.4368800  | 17.24 | 1.3286184  | 0.28014077  |
| ## 65 | 3 | 13.5849800  | 17.28 | 1.2502185  | 0.22084321  |
| ## 66 | 3 | 9.0625900   | 17.96 | 75.1645517 | 3.50769831  |
| ## 67 | 3 | 8.3693500   | 18.03 | 69.4148627 | 3.45582728  |
| ## 68 | 3 | 11.9261400  | 19.77 | 98.9146554 | 3.68353730  |
| ## 69 | 3 | 3.4096000   | 21.27 | 28.2790081 | 2.84097988  |
| ## 70 | 3 | 5.3506800   | 18.51 | 0.4924202  | -0.73411916 |
| ## 71 | 3 | 5.9361300   | 18.40 | 0.5462989  | -0.62323942 |
| ## 72 | 3 | 5.9905200   | 17.58 | 0.5513044  | -0.61355458 |
| ## 73 | 3 | 5.4069100   | 17.79 | 0.4975950  | -0.72290345 |
| ## 74 | 3 | 0.5584300   | 20.94 | 4.6315833  | 1.42118995  |
| ## 75 | 3 | 0.4598800   | 21.13 | 3.8142158  | 1.25299301  |
| ## 76 | 3 | 0.2825900   | 19.52 | 2.3437837  | 0.81649964  |
| ## 77 | 3 | 0.2831800   | 19.69 | 2.3486771  | 0.81841480  |
| ## 78 | 3 | 11.0635400  | 18.09 | 1.0181717  | 0.01799234  |
| ## 79 | 3 | 15.4973400  | 18.25 | 1.4262119  | 0.34879382  |
| ## 80 | 3 | 7.1197500   | 18.13 | 0.6552268  | -0.43183803 |
| ## 81 | 3 | 0.2620600   | 19.74 | 2.1735092  | 0.74697251  |
| ## 82 | 3 | 0.2224400   | 20.03 | 1.8449034  | 0.59405061  |



|       |   |            |       |           |             |
|-------|---|------------|-------|-----------|-------------|
| ## 83 | 3 | 0.3690400  | 19.24 | 3.0607946 | 1.05837233  |
| ## 84 | 3 | 0.2667800  | 19.50 | 2.2126565 | 0.76347523  |
| ## 85 | 3 | 7.8034500  | 17.96 | 0.7181473 | -0.33662223 |
| ## 86 | 3 | 3.7812600  | 18.02 | 0.3479873 | -1.11331580 |
| ## 87 | 3 | 13.1375900 | 17.86 | 1.2090454 | 0.18804067  |
| ## 88 | 3 | 13.0945400 | 17.75 | 1.2050835 | 0.18481962  |
| ## 89 | 3 | 0.1813300  | 19.87 | 1.5039396 | 0.39987341  |
| ## 90 | 3 | 0.1838700  | 20.09 | 1.5250062 | 0.41321829  |
| ## 91 | 3 | 0.8061700  | 18.81 | 6.6863233 | 1.73046170  |
| ## 92 | 3 | 0.4974200  | 19.22 | 4.1255702 | 1.32136144  |

*#select the model*

```
anova(with(ifla,lm(Transformed ~ Irradiation_dose)))
```

## Analysis of Variance Table

##

## Response: Transformed

| ##                  |    | Df      | Sum Sq  | Mean Sq | F value | Pr(>F) |
|---------------------|----|---------|---------|---------|---------|--------|
| ## Irradiation_dose | 4  | 3.875   | 0.96881 | 0.5443  | 0.7036  |        |
| ## Residuals        | 87 | 154.840 | 1.77977 |         |         |        |

```
anova(with(ifla,lm(Transformed ~ Life_stage)))
```

## Analysis of Variance Table

##

## Response: Transformed

| ##            |    | Df      | Sum Sq  | Mean Sq | F value | Pr(>F) |
|---------------|----|---------|---------|---------|---------|--------|
| ## Life_stage | 1  | 0.134   | 0.13373 | 0.0759  | 0.7836  |        |
| ## Residuals  | 90 | 158.582 | 1.76202 |         |         |        |

```
anova(with(ifla,lm(Transformed ~ Irradiation_conditions)))
```

## Analysis of Variance Table

##

## Response: Transformed

| ##                        |    | Df      | Sum Sq | Mean Sq | F value | Pr(>F) |
|---------------------------|----|---------|--------|---------|---------|--------|
| ## Irradiation_conditions | 1  | 3.848   | 3.8478 | 2.2361  | 0.1383  |        |
| ## Residuals              | 90 | 154.867 | 1.7207 |         |         |        |

```
anova(with(ifla,lm(Transformed ~ Irradiation_dose +Life_stage)))
```

## Analysis of Variance Table

##

## Response: Transformed

| ##                  |    | Df      | Sum Sq  | Mean Sq | F value | Pr(>F) |
|---------------------|----|---------|---------|---------|---------|--------|
| ## Irradiation_dose | 4  | 3.875   | 0.96881 | 0.5387  | 0.7077  |        |
| ## Life_stage       | 1  | 0.173   | 0.17339 | 0.0964  | 0.7569  |        |
| ## Residuals        | 86 | 154.667 | 1.79845 |         |         |        |

```
anova(with(ifla,lm(Transformed ~
Irradiation_dose+Irradiation_conditions)))
```

```
## Analysis of Variance Table
##
## Response: Transformed
##              Df Sum Sq Mean Sq F value Pr(>F)
## Irradiation_dose      4   3.875   0.9688   0.5509 0.6989
## Irradiation_conditions 1   3.591   3.5907   2.0416 0.1567
## Residuals            86 151.249   1.7587

anova(with(ifla,lm(Transformed ~ Irradiation_dose *Life_stage)))

## Analysis of Variance Table
##
## Response: Transformed
##              Df Sum Sq Mean Sq F value Pr(>F)
## Irradiation_dose      4   3.875   0.96881   0.5403 0.7065
## Life_stage            1   0.173   0.17339   0.0967 0.7566
## Irradiation_dose:Life_stage 4   7.638   1.90948   1.0649 0.3792
## Residuals            82 147.029   1.79303

anova(with(ifla,lm(Transformed ~ Irradiation_dose
*Irradiation_conditions)))

## Analysis of Variance Table
##
## Response: Transformed
##              Df Sum Sq Mean Sq F value
Pr(>F)
## Irradiation_dose      4   3.875   0.9688   0.5645
0.6891
## Irradiation_conditions 1   3.591   3.5907   2.0921
0.1518
## Irradiation_dose:Irradiation_conditions 3   8.798   2.9327   1.7087
0.1715
## Residuals            83 142.451   1.7163

#-----
-----

mod1 <- lm(Transformed ~ Irradiation_dose + Irradiation_conditions,
data = ifla)
mod2 <- lm(Transformed ~ Irradiation_dose * Irradiation_conditions,
data = ifla)
mod3 <- lm(Transformed ~ Irradiation_dose + Life_stage +
Irradiation_conditions, data = ifla)
mod4 <- lm(Transformed ~ Irradiation_dose * Life_stage *
Irradiation_conditions, data = ifla)
mod5 <- lm(Transformed ~ Irradiation_dose + Life_stage, data = ifla)
mod6 <- lm(Transformed ~ Irradiation_dose*Life_stage, data = ifla)
mod7 <- lm(Transformed ~ Irradiation_dose, data = ifla)
mod8 <- lm(Transformed ~ Irradiation_conditions, data = ifla)
```

```

mod9 <- lm(Transformed ~ Life_stage, data = ifla)
mod10<- lm(Transformed ~ Irradiation_dose*Life_stage, data = ifla)

AICc(mod1,mod2,mod3,mod4,mod5,mod6,mod7,mod8,mod9,mod10)

##          df      AICc
## mod1      7 322.1550
## mod2     10 324.0242
## mod3      8 324.4492
## mod4     19 334.6839
## mod5      7 324.2105
## mod6     11 329.5179
## mod7      6 321.9685
## mod8      3 315.2693
## mod9      3 317.4496
## mod10    11 329.5179

anova(mod8, mod9)

## Analysis of Variance Table
##
## Model 1: Transformed ~ Irradiation_conditions
## Model 2: Transformed ~ Life_stage
##   Res.Df    RSS Df Sum of Sq F Pr(>F)
## 1      90 154.87
## 2      90 158.58  0    -3.7141

##no difference, choose either model but went for the Lowest

summary(mod8)

##
## Call:
## lm(formula = Transformed ~ Irradiation_conditions, data = ifla)
##
## Residuals:
##      Min       1Q   Median       3Q      Max
## -2.4854 -0.9284 -0.0130  0.6477  3.6395
##
## Coefficients:
##              Estimate Std. Error t value Pr(>|t|)
## (Intercept)    0.1134     0.1913   0.593   0.555
## Irradiation_conditionsNormoxia  0.4091     0.2736   1.495   0.138
##
## Residual standard error: 1.312 on 90 degrees of freedom
## Multiple R-squared:  0.02424,    Adjusted R-squared:  0.0134
## F-statistic: 2.236 on 1 and 90 DF,  p-value: 0.1383

#-----
-----

```

```
#####
#####
###Irradiation dose

ifla$Irradiation_dose=as.factor(ifla$Irradiation_dose)
label_parse <- function(breaks) {parse(text = breaks)}

Fig1a<-ggplot(ifla,aes(x=Irradiation_dose,y=Transformed,
fill=Irradiation_dose)) +
  geom_boxplot()+
  geom_jitter(width=0.1,alpha=0.2)+scale_y_continuous(labels =
label_parse)
Fig1a
```

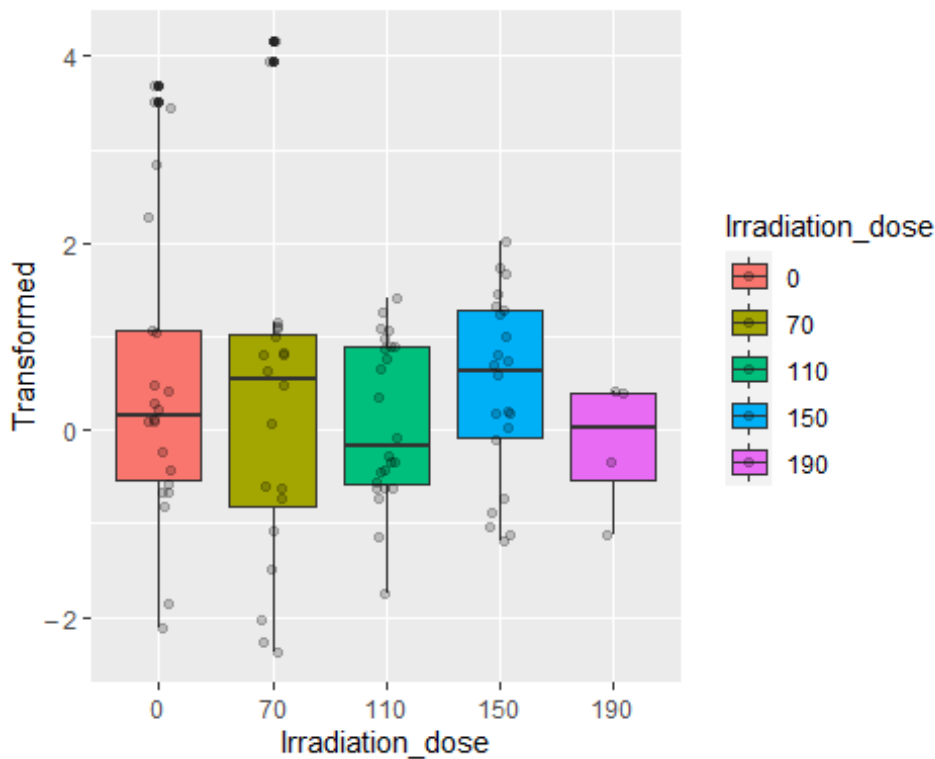

```
tiff("Fig 1a.tiff", width = 4, height = 4, units = 'in', res = 300)
plot(Fig1a+theme_tufte() + theme(axis.line = element_line(size = 1,
colour = "black")) + theme(axis.text.x = element_blank())
+theme(legend.title = element_text(face = "bold")) + theme(legend.text
= element_text(face = "plain"))) + xlab(expression(bold("Irradiation
doses (Gy)")))) + ylab(expression (bold("Transformed relative GmmIV
density"))))
dev.off()

## png
## 2
```

### ###Irradiation status

```
#ifla$Irradiation_conditions=as.factor(ifla$Irradiation_conditions)
```

```
label_parse <- function(breaks) {parse(text = breaks)}
```

```
Fig1b<-ggplot(ifla,aes(x=Irradiation_conditions,y=Transformed,
fill=Irradiation_conditions)) +
  geom_boxplot() + geom_jitter(width=0.1,alpha=0.2)+
  scale_y_continuous(labels = label_parse)
Fig1b
```

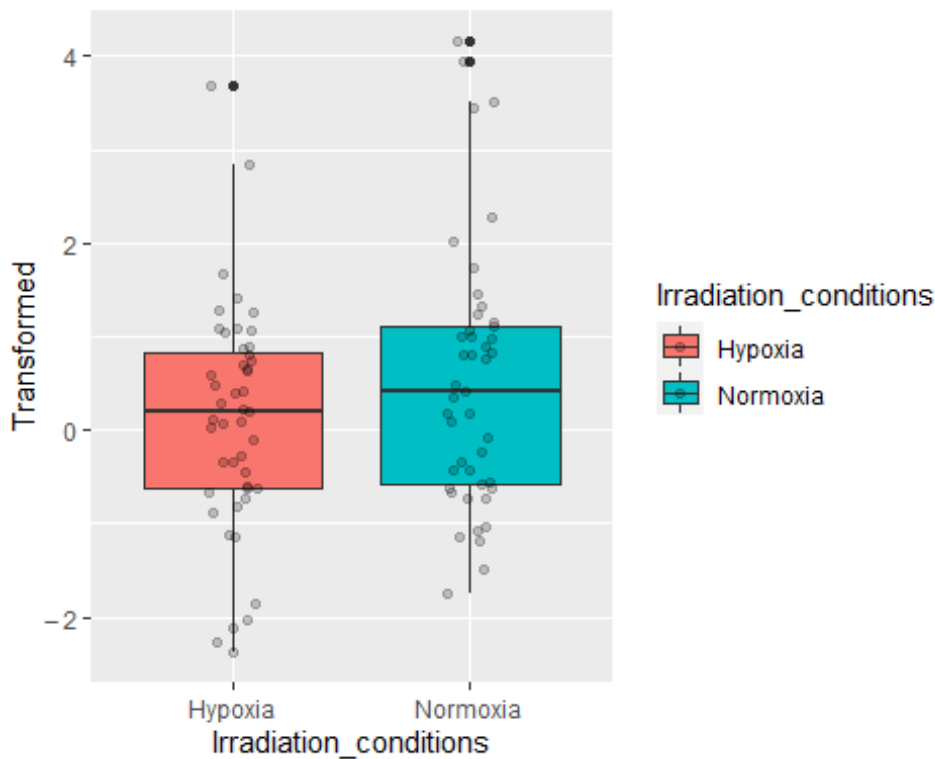

```
tiff("Fig 1b.tiff", width = 4, height = 4, units = 'in', res = 300)
plot(Fig1b+theme_tufte() + theme(axis.line = element_line(size = 1,
colour = "black")) + theme(axis.text.x = element_blank())
+theme(legend.title = element_text(face = "bold")) + theme(legend.text
= element_text(face = "plain"))) + xlab(expression(bold("Irradiation
status "))) + ylab(expression (bold("Transformed relative GmmIV
density"))))
dev.off()
```

```
## png
```

```
## 2
```

### ###Days\_post.irradiation

```
#ifla$Life_stage=as.factor(ifla$Life_stage)
```

```
label_parse <- function(breaks) {parse(text = breaks)}
```

```
Fig1c<-ggplot(ifla,aes(x=Life_stage,y=Transformed, fill=Life_stage)) +
  geom_boxplot() + geom_jitter(width=0.1,alpha=0.2)+
  scale_y_continuous(labels = label_parse)
Fig1c
```

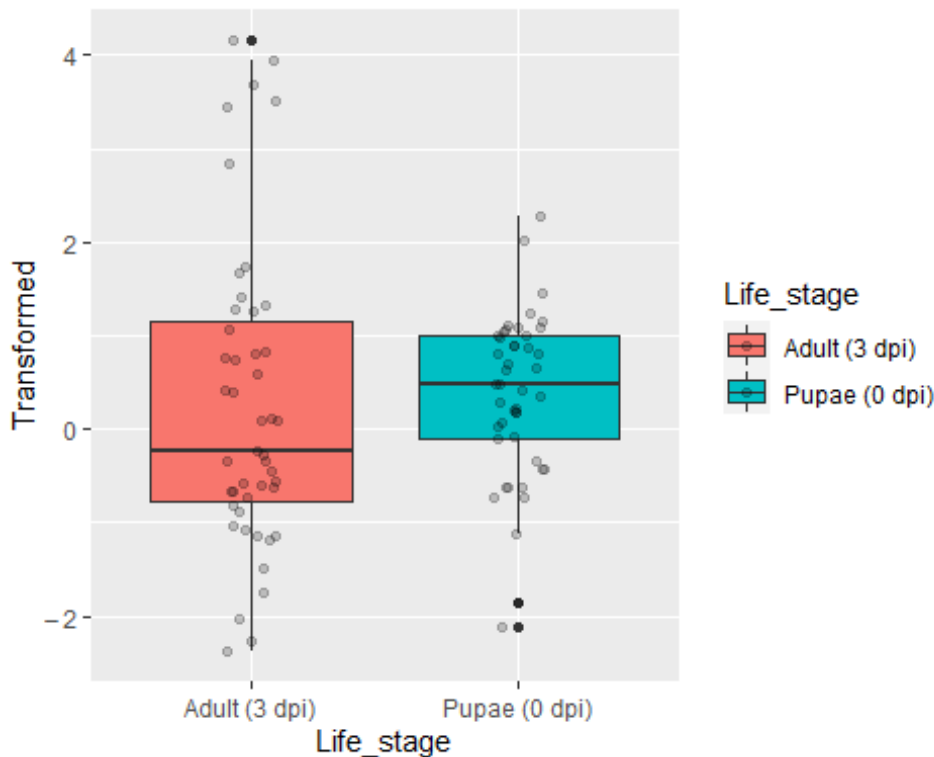

```
tiff("Fig 1c.tiff", width = 4, height = 4, units = 'in', res = 300)
plot(Fig1c+theme_tufte() + theme(axis.line = element_line(size = 1,
colour = "black")) + theme(axis.text.x = element_blank())
+theme(legend.title = element_text(face = "bold")) + theme(legend.text
= element_text(face = "plain")))) + xlab(expression(bold("Days post
irradiation")))) + ylab(expression (bold("Transformed relative GmmIV
density"))))
dev.off()
```

```
## png
## 2
```

**###Irradiation dose according to air status**

```
label_parse <- function(breaks) {parse(text = breaks)}
```

```
Fig2a<-ggplot(ifla, aes(x=Irradiation_dose,y=Transformed,
colour=Irradiation_conditions)) +
  geom_boxplot(position=position_dodge(0.8))+
  geom_jitter(position=position_dodge(0.8))+ scale_y_continuous(labels
```

```
= label_parse)
```

Fig2a

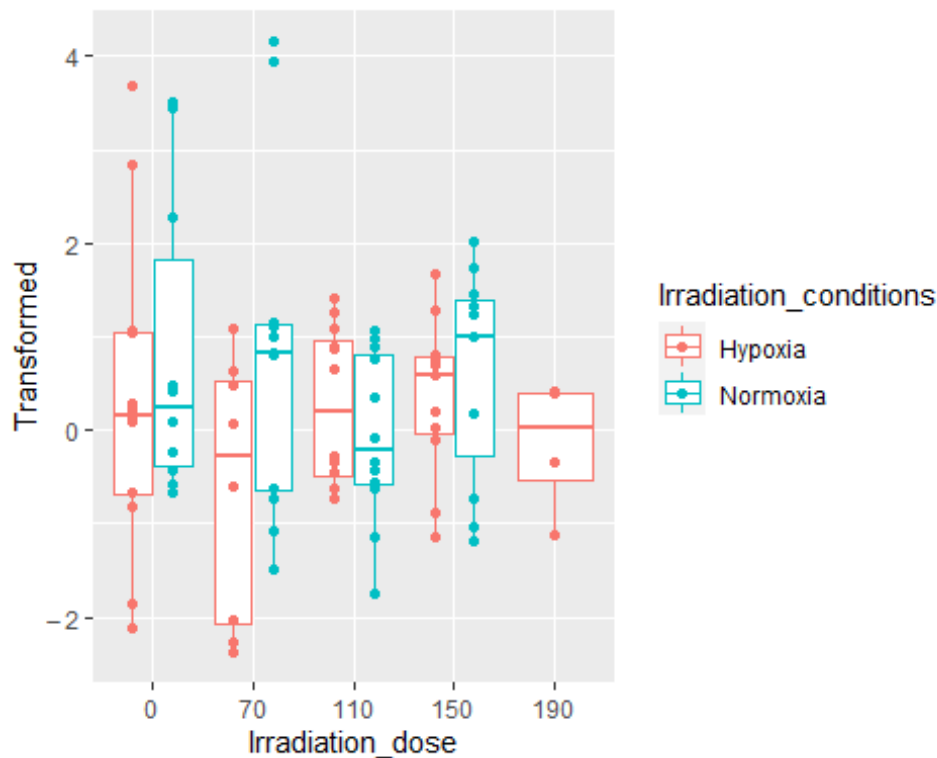

```
tiff("Fig 2a.tiff", width = 7, height = 4, units = 'in',compression =
'lwz',res = 300)
plot(Fig2a+theme_tufte() + theme(axis.line = element_line(size = 1,
colour = "black")) + theme(legend.title= element_text(face = "bold")) +
theme(legend.text = element_text(face = "plain"))) + theme(axis.text.x
= element_text(colour = "black")) + theme(axis.text.y =
element_text(colour = "black")) + xlab(expression(bold("Irradiation
dose (Gy)")))) + ylab(expression(bold("GmmIV_ ")~bold("Transformed
normalized density"))))
dev.off()
```

```
## png
## 2
```

```
###Irradiation dose according to pupae stage/ days post irradiation
label_parse <- function(breaks) {parse(text = breaks)}
```

```
Fig2b<-ggplot(ifla, aes(x=Irradiation_dose,y=Transformed,
colour=Life_stage)) +
  geom_boxplot(position=position_dodge(0.8))+
  geom_jitter(position=position_dodge(0.8))+ scale_y_continuous(labels
= label_parse)
```

Fig2b

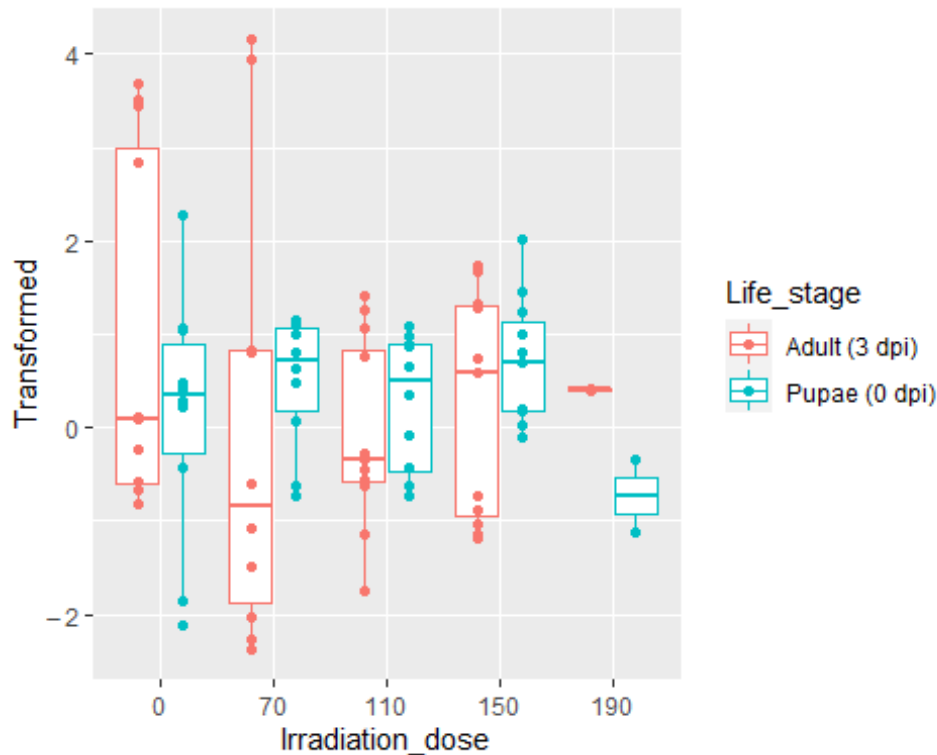

```
tiff("Fig 2b.tiff", width = 7, height = 4, units = 'in',compression =
'lzw',res = 300)
plot(Fig2b+theme_tufte() + theme(axis.line = element_line(size = 1,
colour = "black")) + theme(legend.title= element_text(face = "bold")) +
theme(legend.text = element_text(face = "plain"))) + theme(axis.text.x
= element_text(colour = "black")) + theme(axis.text.y =
element_text(colour = "black")) + xlab(expression(bold("Irradiation
dose (Gy)")))) + ylab(expression(bold("GmmIV_ ")~bold("Transformed
normalized density"))))
dev.off()
```

```
## png
## 2
```

```
# #Statistics iflaevirus for subsets
```

```
#-----
```

```
#iflaevirus-Normoxia
```

```
#-----
```

```
#iflaNorm<- read.csv("iflaevirus_alldata_normalized.csv")
iflaNorm<- subset(ifla, Irradiation_conditions=="Normoxia")
iflaNorm
```

```
## Target Sample Irradiation_dose Dpi Life_stage
Irradiation_conditions
```



|       |          |     |     |                 |
|-------|----------|-----|-----|-----------------|
| ## 3  | GmmIV    | 18A | 0   | 3 Adult (3 dpi) |
|       | Normoxia |     |     |                 |
| ## 4  | GmmIV    | 18B | 0   | 3 Adult (3 dpi) |
|       | Normoxia |     |     |                 |
| ## 7  | GmmIV    | 9A  | 0   | 0 Pupae (0 dpi) |
|       | Normoxia |     |     |                 |
| ## 8  | GmmIV    | 9B  | 0   | 0 Pupae (0 dpi) |
|       | Normoxia |     |     |                 |
| ## 11 | GmmIV    | 14A | 70  | 3 Adult (3 dpi) |
|       | Normoxia |     |     |                 |
| ## 12 | GmmIV    | 14B | 70  | 3 Adult (3 dpi) |
|       | Normoxia |     |     |                 |
| ## 15 | GmmIV    | 5A  | 70  | 0 Pupae (0 dpi) |
|       | Normoxia |     |     |                 |
| ## 16 | GmmIV    | 5B  | 70  | 0 Pupae (0 dpi) |
|       | Normoxia |     |     |                 |
| ## 19 | GmmIV    | 15A | 110 | 3 Adult (3 dpi) |
|       | Normoxia |     |     |                 |
| ## 20 | GmmIV    | 15B | 110 | 3 Adult (3 dpi) |
|       | Normoxia |     |     |                 |
| ## 23 | GmmIV    | 6A  | 110 | 0 Pupae (0 dpi) |
|       | Normoxia |     |     |                 |
| ## 24 | GmmIV    | 6B  | 110 | 0 Pupae (0 dpi) |
|       | Normoxia |     |     |                 |
| ## 27 | GmmIV    | 16B | 150 | 3 Adult (3 dpi) |
|       | Normoxia |     |     |                 |
| ## 30 | GmmIV    | 7A  | 150 | 0 Pupae (0 dpi) |
|       | Normoxia |     |     |                 |
| ## 31 | GmmIV    | 7B  | 150 | 0 Pupae (0 dpi) |
|       | Normoxia |     |     |                 |
| ## 32 | GmmIV    | 1A  | 0   | 0 Pupae (0 dpi) |
|       | Normoxia |     |     |                 |
| ## 33 | GmmIV    | 1B  | 0   | 0 Pupae (0 dpi) |
|       | Normoxia |     |     |                 |
| ## 38 | GmmIV    | 3a  | 0   | 3 Adult (3 dpi) |
|       | Normoxia |     |     |                 |
| ## 39 | GmmIV    | 3b  | 0   | 3 Adult (3 dpi) |
|       | Normoxia |     |     |                 |
| ## 40 | GmmIV    | 21A | 70  | 0 Pupae (0 dpi) |
|       | Normoxia |     |     |                 |
| ## 41 | GmmIV    | 21B | 70  | 0 Pupae (0 dpi) |
|       | Normoxia |     |     |                 |
| ## 44 | GmmIV    | 6A  | 70  | 3 Adult (3 dpi) |
|       | Normoxia |     |     |                 |
| ## 45 | GmmIV    | 6B  | 70  | 3 Adult (3 dpi) |
|       | Normoxia |     |     |                 |
| ## 48 | GmmIV    | 22A | 110 | 0 Pupae (0 dpi) |
|       | Normoxia |     |     |                 |
| ## 49 | GmmIV    | 22B | 110 | 0 Pupae (0 dpi) |
|       | Normoxia |     |     |                 |

|          |       |     |     |                 |
|----------|-------|-----|-----|-----------------|
| ## 52    | GmmIV | 7A  | 110 | 3 Adult (3 dpi) |
| Normoxia |       |     |     |                 |
| ## 53    | GmmIV | 7B  | 110 | 3 Adult (3 dpi) |
| Normoxia |       |     |     |                 |
| ## 58    | GmmIV | 23A | 150 | 0 Pupae (0 dpi) |
| Normoxia |       |     |     |                 |
| ## 59    | GmmIV | 23B | 150 | 0 Pupae (0 dpi) |
| Normoxia |       |     |     |                 |
| ## 62    | GmmIV | 8A  | 150 | 3 Adult (3 dpi) |
| Normoxia |       |     |     |                 |
| ## 63    | GmmIV | 8B  | 150 | 3 Adult (3 dpi) |
| Normoxia |       |     |     |                 |
| ## 66    | GmmIV | 17A | 0   | 3 Adult (3 dpi) |
| Normoxia |       |     |     |                 |
| ## 67    | GmmIV | 17B | 0   | 3 Adult (3 dpi) |
| Normoxia |       |     |     |                 |
| ## 72    | GmmIV | 13A | 70  | 0 Pupae (0 dpi) |
| Normoxia |       |     |     |                 |
| ## 73    | GmmIV | 13B | 70  | 0 Pupae (0 dpi) |
| Normoxia |       |     |     |                 |
| ## 76    | GmmIV | 22A | 70  | 3 Adult (3 dpi) |
| Normoxia |       |     |     |                 |
| ## 77    | GmmIV | 22B | 70  | 3 Adult (3 dpi) |
| Normoxia |       |     |     |                 |
| ## 79    | GmmIV | 14A | 110 | 0 Pupae (0 dpi) |
| Normoxia |       |     |     |                 |
| ## 80    | GmmIV | 14B | 110 | 0 Pupae (0 dpi) |
| Normoxia |       |     |     |                 |
| ## 83    | GmmIV | 4A  | 110 | 3 Adult (3 dpi) |
| Normoxia |       |     |     |                 |
| ## 84    | GmmIV | 4B  | 110 | 3 Adult (3 dpi) |
| Normoxia |       |     |     |                 |
| ## 87    | GmmIV | 15A | 150 | 0 Pupae (0 dpi) |
| Normoxia |       |     |     |                 |
| ## 88    | GmmIV | 15B | 150 | 0 Pupae (0 dpi) |
| Normoxia |       |     |     |                 |
| ## 91    | GmmIV | 5A  | 150 | 3 Adult (3 dpi) |
| Normoxia |       |     |     |                 |
| ## 92    | GmmIV | 5B  | 150 | 3 Adult (3 dpi) |
| Normoxia |       |     |     |                 |

| ##    | Replicate | Expression | Mean.Cq | Normalized_expression | Transformed |
|-------|-----------|------------|---------|-----------------------|-------------|
| ## 3  | 1         | 0.13465    | 21.74   | 0.5686593             | -0.58070931 |
| ## 4  | 1         | 0.12535    | 21.86   | 0.5293832             | -0.65670601 |
| ## 7  | 1         | 4.27746    | 20.65   | 13.0773182            | 2.26699785  |
| ## 8  | 1         | 0.21319    | 24.97   | 0.6517778             | -0.43734511 |
| ## 11 | 1         | 51.48849   | 23.08   | 217.4482759           | 4.16199580  |
| ## 12 | 1         | 35.43207   | 23.73   | 149.6381528           | 3.93967708  |
| ## 15 | 1         | 1.11047    | 21.11   | 3.3949983             | 1.15055481  |
| ## 16 | 1         | 0.76002    | 21.47   | 2.3235807             | 0.80854586  |
| ## 19 | 1         | 0.17008    | 20.48   | 0.7182887             | -0.33641872 |

```
## 20      1      0.13774      20.66      0.5817091 -0.55672992
## 23      1      0.30250      22.33      0.9248219 -0.07846029
## 24      1      0.17713      22.62      0.5415329 -0.63255198
## 27      1      0.08905      22.69      0.3760796 -1.02737202
## 30      1      3.07915      19.95      9.4137699  2.00858578
## 31      1      0.94672      20.14      2.8943716  1.00824280
## 32      2     41.69589      18.76      1.5284571  0.41538497
## 33      2     44.19365      18.90      1.6200182  0.47098498
## 38      2      2.44118      21.48      1.0952840  0.09060080
## 39      2      1.77502      21.63      0.7963981 -0.23026726
## 40      2     77.49998      18.05      2.8409370  0.99147185
## 41      2     89.13715      18.02      3.2675238  1.11662237
## 44      2      0.79904      21.06      0.3585052 -1.08027279
## 45      2      0.55698      21.31      0.2499002 -1.48744234
## 48      2     77.04315      18.06      2.8241909  0.98614442
## 49      2     70.01336      18.17      2.5664980  0.89948632
## 52      2      0.75667      25.64      0.3394951 -1.14080706
## 53      2      0.44377      25.93      0.1991063 -1.75145145
## 58      2    131.25527      17.80      4.8114587  1.45381433
## 59      2   103.32956      18.06      3.7877787  1.24690704
## 62      2      1.09367      21.94      0.4906968 -0.73788318
## 63      2      0.72127      21.90      0.3236122 -1.19431485
## 66      3      9.06259      17.96     75.1645517  3.50769831
## 67      3      8.36935      18.03     69.4148627  3.45582728
## 72      3      5.99052      17.58      0.5513044 -0.61355458
## 73      3      5.40691      17.79      0.4975950 -0.72290345
## 76      3      0.28259      19.52      2.3437837  0.81649964
## 77      3      0.28318      19.69      2.3486771  0.81841480
## 79      3     15.49734      18.25      1.4262119  0.34879382
## 80      3      7.11975      18.13      0.6552268 -0.43183803
## 83      3      0.36904      19.24      3.0607946  1.05837233
## 84      3      0.26678      19.50      2.2126565  0.76347523
## 87      3     13.13759      17.86      1.2090454  0.18804067
## 88      3     13.09454      17.75      1.2050835  0.18481962
## 91      3      0.80617      18.81      6.6863233  1.73046170
## 92      3      0.49742      19.22      4.1255702  1.32136144
```

```
#-----
anova(with(iflaNorm,lm(Transformed~ Life_stage*Irradiation_dose)))

## Analysis of Variance Table
##
## Response: Transformed
##
##              Df Sum Sq Mean Sq F value Pr(>F)
## Life_stage      1  0.114  0.11429   0.0563 0.8138
## Irradiation_dose  3  6.380  2.12671   1.0473 0.3831
## Life_stage:Irradiation_dose  3  5.099  1.69966   0.8370 0.4822
## Residuals      37 75.135  2.03067

anova(with(iflaNorm,lm(Transformed~ Life_stage +Irradiation_dose)))
```

```

## Analysis of Variance Table
##
## Response: Transformed
##           Df Sum Sq Mean Sq F value Pr(>F)
## Life_stage      1  0.114  0.11429   0.0570 0.8126
## Irradiation_dose 3  6.380  2.12671   1.0603 0.3767
## Residuals      40 80.234  2.00585

anova(with(iflaNorm,lm(Transformed~ Life_stage)))

## Analysis of Variance Table
##
## Response: Transformed
##           Df Sum Sq Mean Sq F value Pr(>F)
## Life_stage      1  0.114  0.11429   0.0567 0.8129
## Residuals      43 86.614  2.01428

anova(with(iflaNorm,lm(Transformed~ Irradiation_dose)))

## Analysis of Variance Table
##
## Response: Transformed
##           Df Sum Sq Mean Sq F value Pr(>F)
## Irradiation_dose 3  6.313   2.1043   1.0729 0.3712
## Residuals      41 80.415   1.9613

mod1 <- lm(Transformed ~ Irradiation_dose, data = iflaNorm)
mod5 <- lm(Transformed~ Irradiation_dose+Life_stage, data = iflaNorm)
mod6 <- lm(Transformed ~ Irradiation_dose*Life_stage, data = iflaNorm)
mod11 <- lm(Transformed ~Life_stage, data = iflaNorm)

AICc(mod1, mod5, mod6, mod11)

##           df           AICc
## mod1         5 165.3674
## mod5         6 167.9377
## mod6         9 173.9153
## mod11        3 163.7558

anova(mod11, mod1)

## Analysis of Variance Table
##
## Model 1: Transformed ~ Life_stage
## Model 2: Transformed ~ Irradiation_dose
##   Res.Df    RSS Df Sum of Sq      F Pr(>F)
## 1         43 86.614
## 2         41 80.415  2      6.1985 1.5802 0.2182

summary(mod11)

```

```
##
## Call:
## lm(formula = Transformed ~ Life_stage, data = iflaNorm)
##
## Residuals:
##      Min       1Q   Median       3Q      Max
## -2.2247 -1.0539 -0.1586  0.5765  3.6888
##
## Coefficients:
##              Estimate Std. Error t value Pr(>|t|)
## (Intercept)      0.4732     0.2959   1.599   0.117
## Life_stagePupae (0 dpi)  0.1008     0.4232   0.238   0.813
##
## Residual standard error: 1.419 on 43 degrees of freedom
## Multiple R-squared:  0.001318,    Adjusted R-squared:  -0.02191
## F-statistic: 0.05674 on 1 and 43 DF,  p-value: 0.8129

#-----

#FIGURE_normoxia
#iflaNorm$Life_stage=as.factor(iflaNorm$Life_stage)

label_parse <- function(breaks) {parse(text = breaks)}

FigS2A<-ggplot(iflaNorm, aes(x=Irradiation_dose,y=Transformed, colour=
Life_stage
)) +geom_boxplot(position=position_dodge(0.8))+
  geom_jitter(position=position_dodge(0.8))+
  scale_y_continuous(labels = label_parse)

FigS2A
```

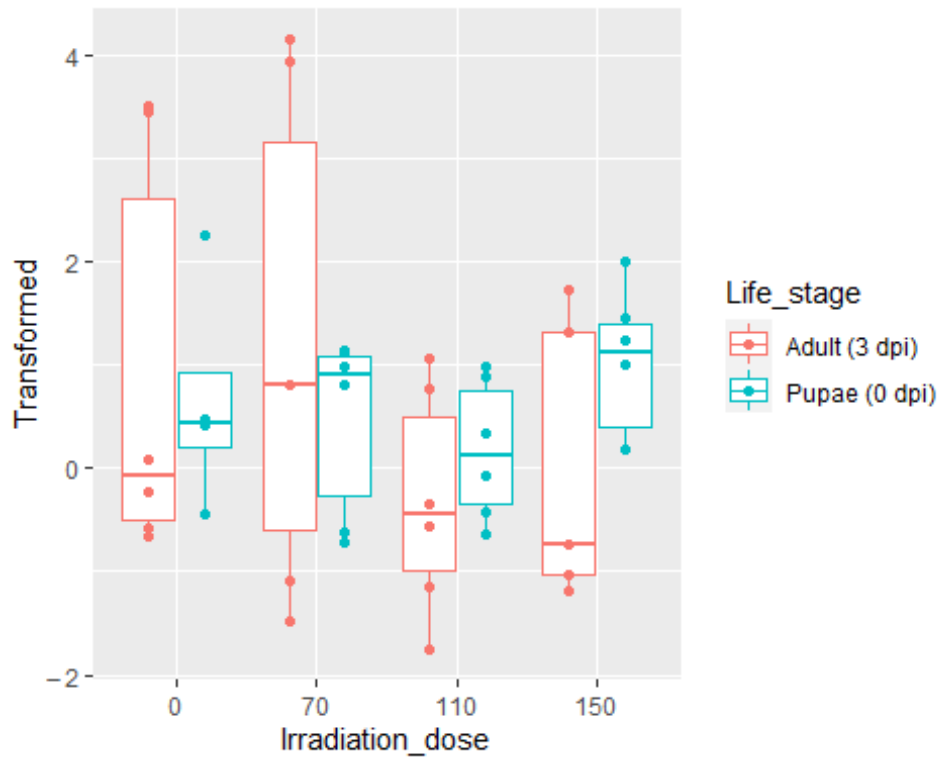

```
tiff("Fig S2A.tiff", width = 7, height = 4, units = 'in',compression =
'lzw',res = 300)
plot(FigS2A+theme_tufte() + theme(axis.line = element_line(size = 1,
colour = "black")) + theme(legend.title= element_text(face = "bold")) +
theme(legend.text = element_text(face = "plain"))) + theme(axis.text.x
= element_text(colour = "black")) + theme(axis.text.y =
element_text(colour = "black")) + xlab(expression(bold("Irradiation
dose (Gy)")))) + ylab(expression(bold("GmmIV_ ")~bold("Normoxia
transformed relative density"))))
dev.off()

## png
## 2

#-----
#iflaevirus-Hypoxia
#-----
#iflaHypox <- read.csv("iflaevirus_allldata_normalized.csv")
iflaHypox <- subset(ifla , Irradiation_conditions=="Hypoxia")

#-----
---
anova(with(iflaHypox,lm(Transformed~ Life_stage+Irradiation_dose)))

## Analysis of Variance Table
##
## Response: Transformed
```

```

##              Df Sum Sq Mean Sq F value Pr(>F)
## Life_stage      1  0.033  0.03318   0.0219 0.8830
## Irradiation_dose 4   6.117  1.52936   1.0115 0.4127
## Residuals      41 61.989  1.51192

anova(with(iflaHypox,lm(Transformed~ Life_stage*Irradiation_dose)))

## Analysis of Variance Table
##
## Response: Transformed
##              Df Sum Sq Mean Sq F value  Pr(>F)
## Life_stage      1  0.033  0.0332   0.0269 0.87064
## Irradiation_dose 4   6.117  1.5294   1.2396 0.31107
## Life_stage:Irradiation_dose 4 16.340  4.0849   3.3110 0.02046 *
## Residuals      37 45.649  1.2338
## ---
## Signif. codes:  0 '***' 0.001 '**' 0.01 '*' 0.05 '.' 0.1 ' ' 1

anova(with(iflaHypox,lm(Transformed~ Life_stage)))

## Analysis of Variance Table
##
## Response: Transformed
##              Df Sum Sq Mean Sq F value Pr(>F)
## Life_stage      1  0.033  0.03318   0.0219  0.883
## Residuals      45 68.106  1.51347

anova(with(iflaHypox,lm(Transformed~ Irradiation_dose)))

## Analysis of Variance Table
##
## Response: Transformed
##              Df Sum Sq Mean Sq F value Pr(>F)
## Irradiation_dose 4   6.103  1.5258   1.033 0.4015
## Residuals      42 62.036  1.4770

mod1 <- lm(Transformed ~ Irradiation_dose, data = iflaHypox)
mod5 <- lm(Transformed~ Irradiation_dose+Life_stage, data = iflaHypox)
mod6 <- lm(Transformed ~ Irradiation_dose*Life_stage, data = iflaHypox)
mod11 <- lm(Transformed ~Life_stage, data = iflaHypox)

AICc(mod1, mod5, mod6, mod11)

##      df      AICc
## mod1    6 160.5258
## mod5    7 163.2617
## mod6   11 161.5522
## mod11    3 157.3715

anova(mod11, mod6)

```

```
## Analysis of Variance Table
##
## Model 1: Transformed ~ Life_stage
## Model 2: Transformed ~ Irradiation_dose * Life_stage
##   Res.Df    RSS Df Sum of Sq      F Pr(>F)
## 1      45 68.106
## 2      37 45.649  8    22.457 2.2753 0.04327 *
## ---
## Signif. codes:  0 '***' 0.001 '**' 0.01 '*' 0.05 '.' 0.1 ' ' 1

summary(mod11)

##
## Call:
## lm(formula = Transformed ~ Life_stage, data = iflaHypox)
##
## Residuals:
##      Min       1Q   Median       3Q      Max
## -2.4594 -0.7253  0.0516  0.6965  3.5962
##
## Coefficients:
##              Estimate Std. Error t value Pr(>|t|)
## (Intercept)      0.08738    0.25112   0.348   0.729
## Life_stagePupae (0 dpi) 0.05315    0.35898   0.148   0.883
##
## Residual standard error: 1.23 on 45 degrees of freedom
## Multiple R-squared:  0.0004869, Adjusted R-squared: -0.02172
## F-statistic: 0.02192 on 1 and 45 DF, p-value: 0.883

summary(mod6)

##
## Call:
## lm(formula = Transformed ~ Irradiation_dose * Life_stage, data =
iflaHypox)
##
## Residuals:
##      Min       1Q   Median       3Q      Max
## -1.87999 -0.58719 -0.00667  0.51079  2.80670
##
## Coefficients:
##              Estimate Std. Error t
value      Estimate Std. Error t
## (Intercept)      0.87683    0.45346
1.934
## Irradiation_dose70      -2.69181    0.71698  -
3.754
## Irradiation_dose110     -0.71270    0.64129  -
1.111
## Irradiation_dose150     -0.49381    0.64129  -
0.770
```



```

## Irradiation_dose190                -0.47029    0.90692  -
0.519
## Life_stagePupae (0 dpi)            -1.10198    0.64129  -
1.718
## Irradiation_dose70:Life_stagePupae (0 dpi)  3.48263    1.01397
3.435
## Irradiation_dose110:Life_stagePupae (0 dpi)  1.29996    0.90692
1.433
## Irradiation_dose150:Life_stagePupae (0 dpi)  1.03851    0.92932
1.117
## Irradiation_dose190:Life_stagePupae (0 dpi) -0.02953    1.28258  -
0.023
##                                     Pr(>|t|)
## (Intercept)                        0.060834 .
## Irradiation_dose70                 0.000597 ***
## Irradiation_dose110                0.273583
## Irradiation_dose150                0.446176
## Irradiation_dose190                0.607158
## Life_stagePupae (0 dpi)            0.094084 .
## Irradiation_dose70:Life_stagePupae (0 dpi)  0.001478 **
## Irradiation_dose110:Life_stagePupae (0 dpi) 0.160148
## Irradiation_dose150:Life_stagePupae (0 dpi) 0.270985
## Irradiation_dose190:Life_stagePupae (0 dpi) 0.981755
## ---
## Signif. codes:  0 '***' 0.001 '**' 0.01 '*' 0.05 '.' 0.1 ' ' 1
##
## Residual standard error: 1.111 on 37 degrees of freedom
## Multiple R-squared:  0.3301, Adjusted R-squared:  0.1671
## F-statistic: 2.025 on 9 and 37 DF,  p-value: 0.06392

#-----

###Figure hypoxia
label_parse <- function(breaks) {parse(text = breaks)}

FigS2B<-ggplot(iflaHypox, aes(x=Irradiation_dose,y=Transformed, colour=
Life_stage)) +
  geom_boxplot(position=position_dodge(0.8))+
  geom_jitter(position=position_dodge(0.8)) + scale_y_continuous(labels
= label_parse)

FigS2B

```

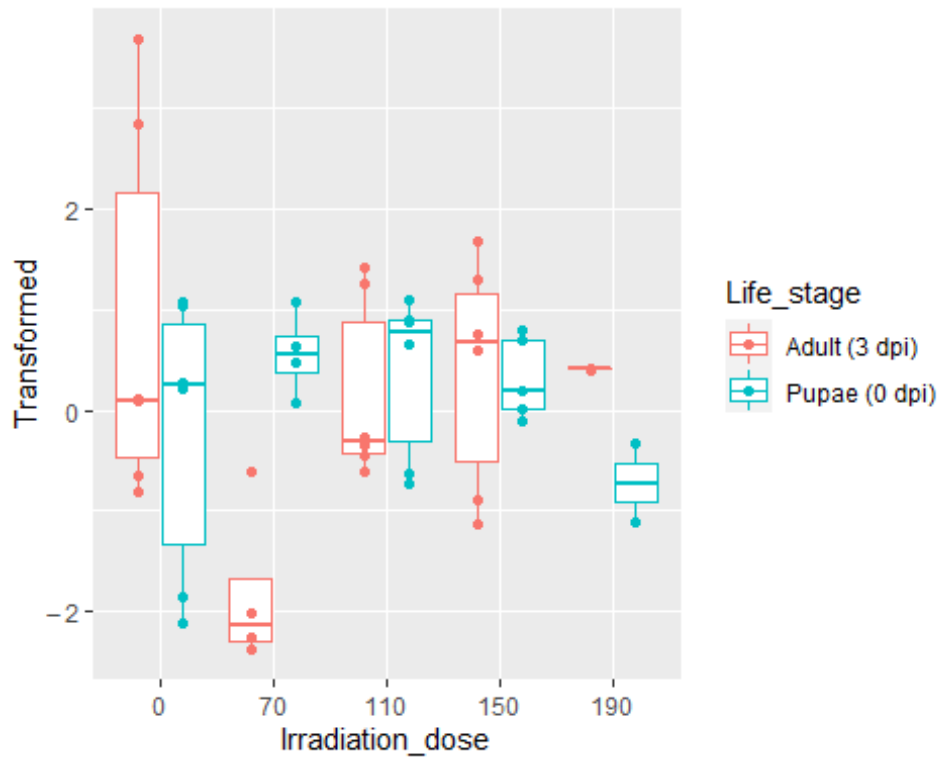

```
tiff("Fig S2B.tiff", width = 7, height = 4, units = 'in',compression =
'lzw',res = 300)
plot(FigS2B+theme_tufte() + theme(axis.line = element_line(size = 1,
colour = "black")) + theme(legend.title= element_text(face = "bold")) +
theme(legend.text = element_text(face = "plain"))) + theme(axis.text.x
= element_text(colour = "black")) + theme(axis.text.y =
element_text(colour = "black")) + xlab(expression(bold("Irradiation
dose (Gy)")))) + ylab(expression(bold("GmmIV_ ")~bold("Hypoxia
Transformed relative density")))+ scale_y_continuous(labels =
label_parse)
```

```
## Scale for 'y' is already present. Adding another scale for 'y',
which will
## replace the existing scale.
```

```
dev.off()
```

```
## png
## 2
```

```
#
#work with GmmNegV data
```

```
neg<-subset(qpcr, Target=="GmmNegV")
neg
```

```
##      Target Sample Irradiation_dose Dpi      Life_stage
Irradiation_conditions
```

|                |     |    |                 |
|----------------|-----|----|-----------------|
| ## 93 GmmNegV  | 17A | 0  | 3 Adult (3 dpi) |
| Hypoxia        |     |    |                 |
| ## 94 GmmNegV  | 17B | 0  | 3 Adult (3 dpi) |
| Hypoxia        |     |    |                 |
| ## 95 GmmNegV  | 18A | 0  | 3 Adult (3 dpi) |
| Normoxia       |     |    |                 |
| ## 96 GmmNegV  | 18B | 0  | 3 Adult (3 dpi) |
| Normoxia       |     |    |                 |
| ## 97 GmmNegV  | 8A  | 0  | 0 Pupae (0 dpi) |
| Hypoxia        |     |    |                 |
| ## 98 GmmNegV  | 8B  | 0  | 0 Pupae (0 dpi) |
| Hypoxia        |     |    |                 |
| ## 99 GmmNegV  | 9A  | 0  | 0 Pupae (0 dpi) |
| Normoxia       |     |    |                 |
| ## 100 GmmNegV | 9B  | 0  | 0 Pupae (0 dpi) |
| Normoxia       |     |    |                 |
| ## 101 GmmNegV | 16B | 0  | 0 Pupae (0 dpi) |
| Hypoxia        |     |    |                 |
| ## 102 GmmNegV | 16B | 0  | 0 Pupae (0 dpi) |
| Hypoxia        |     |    |                 |
| ## 103 GmmNegV | 17A | 0  | 3 Adult (3 dpi) |
| Normoxia       |     |    |                 |
| ## 104 GmmNegV | 17B | 0  | 3 Adult (3 dpi) |
| Normoxia       |     |    |                 |
| ## 105 GmmNegV | 6A  | 0  | 3 Adult (3 dpi) |
| Normoxia       |     |    |                 |
| ## 106 GmmNegV | 6B  | 0  | 3 Adult (3 dpi) |
| Normoxia       |     |    |                 |
| ## 107 GmmNegV | 1A  | 0  | 0 Pupae (0 dpi) |
| Hypoxia        |     |    |                 |
| ## 108 GmmNegV | 1B  | 0  | 0 Pupae (0 dpi) |
| Hypoxia        |     |    |                 |
| ## 109 GmmNegV | 2A  | 0  | 3 Adult (3 dpi) |
| Hypoxia        |     |    |                 |
| ## 110 GmmNegV | 2B  | 0  | 3 Adult (3 dpi) |
| Hypoxia        |     |    |                 |
| ## 111 GmmNegV | 3a  | 0  | 3 Adult (3 dpi) |
| Normoxia       |     |    |                 |
| ## 112 GmmNegV | 3b  | 0  | 3 Adult (3 dpi) |
| Normoxia       |     |    |                 |
| ## 113 GmmNegV | 4a  | 0  | 3 Adult (3 dpi) |
| Hypoxia        |     |    |                 |
| ## 114 GmmNegV | 4b  | 0  | 3 Adult (3 dpi) |
| Hypoxia        |     |    |                 |
| ## 115 GmmNegV | 11A | 70 | 3 Adult (3 dpi) |
| Hypoxia        |     |    |                 |
| ## 116 GmmNegV | 11B | 70 | 3 Adult (3 dpi) |
| Hypoxia        |     |    |                 |
| ## 117 GmmNegV | 14A | 70 | 3 Adult (3 dpi) |
| Normoxia       |     |    |                 |

|                |     |     |                 |
|----------------|-----|-----|-----------------|
| ## 118 GmmNegV | 14B | 70  | 3 Adult (3 dpi) |
| Normoxia       |     |     |                 |
| ## 119 GmmNegV | 21A | 70  | 0 Pupae (0 dpi) |
| Normoxia       |     |     |                 |
| ## 120 GmmNegV | 21B | 70  | 0 Pupae (0 dpi) |
| Normoxia       |     |     |                 |
| ## 121 GmmNegV | 2A  | 70  | 0 Pupae (0 dpi) |
| Hypoxia        |     |     |                 |
| ## 122 GmmNegV | 2B  | 70  | 0 Pupae (0 dpi) |
| Hypoxia        |     |     |                 |
| ## 123 GmmNegV | 5A  | 70  | 0 Pupae (0 dpi) |
| Normoxia       |     |     |                 |
| ## 124 GmmNegV | 5B  | 70  | 0 Pupae (0 dpi) |
| Normoxia       |     |     |                 |
| ## 125 GmmNegV | 10A | 110 | 0 Pupae (0 dpi) |
| Hypoxia        |     |     |                 |
| ## 126 GmmNegV | 10B | 110 | 0 Pupae (0 dpi) |
| Hypoxia        |     |     |                 |
| ## 127 GmmNegV | 13A | 70  | 0 Pupae (0 dpi) |
| Normoxia       |     |     |                 |
| ## 128 GmmNegV | 13B | 70  | 0 Pupae (0 dpi) |
| Normoxia       |     |     |                 |
| ## 129 GmmNegV | 19A | 110 | 3 Adult (3 dpi) |
| Hypoxia        |     |     |                 |
| ## 130 GmmNegV | 19B | 110 | 3 Adult (3 dpi) |
| Hypoxia        |     |     |                 |
| ## 131 GmmNegV | 22A | 70  | 3 Adult (3 dpi) |
| Normoxia       |     |     |                 |
| ## 132 GmmNegV | 22B | 70  | 3 Adult (3 dpi) |
| Normoxia       |     |     |                 |
| ## 133 GmmNegV | 3A  | 70  | 3 Adult (3 dpi) |
| Hypoxia        |     |     |                 |
| ## 134 GmmNegV | 3B  | 70  | 3 Adult (3 dpi) |
| Hypoxia        |     |     |                 |
| ## 135 GmmNegV | 6A  | 70  | 3 Adult (3 dpi) |
| Normoxia       |     |     |                 |
| ## 136 GmmNegV | 6B  | 70  | 3 Adult (3 dpi) |
| Normoxia       |     |     |                 |
| ## 137 GmmNegV | 2A  | 70  | 0 Pupae (0 dpi) |
| Hypoxia        |     |     |                 |
| ## 138 GmmNegV | 2B  | 70  | 0 Pupae (0 dpi) |
| Hypoxia        |     |     |                 |
| ## 139 GmmNegV | 12A | 110 | 3 Adult (3 dpi) |
| Hypoxia        |     |     |                 |
| ## 140 GmmNegV | 12B | 110 | 3 Adult (3 dpi) |
| Hypoxia        |     |     |                 |
| ## 141 GmmNegV | 15A | 110 | 3 Adult (3 dpi) |
| Normoxia       |     |     |                 |
| ## 142 GmmNegV | 15B | 110 | 3 Adult (3 dpi) |
| Normoxia       |     |     |                 |

|                |     |     |                 |
|----------------|-----|-----|-----------------|
| ## 143 GmmNegV | 22A | 110 | 0 Pupae (0 dpi) |
| Normoxia       |     |     |                 |
| ## 144 GmmNegV | 22B | 110 | 0 Pupae (0 dpi) |
| Normoxia       |     |     |                 |
| ## 145 GmmNegV | 3A  | 110 | 0 Pupae (0 dpi) |
| Hypoxia        |     |     |                 |
| ## 146 GmmNegV | 3B  | 110 | 0 Pupae (0 dpi) |
| Hypoxia        |     |     |                 |
| ## 147 GmmNegV | 6A  | 110 | 0 Pupae (0 dpi) |
| Normoxia       |     |     |                 |
| ## 148 GmmNegV | 6B  | 110 | 0 Pupae (0 dpi) |
| Normoxia       |     |     |                 |
| ## 149 GmmNegV | 11A | 150 | 0 Pupae (0 dpi) |
| Hypoxia        |     |     |                 |
| ## 150 GmmNegV | 11B | 150 | 0 Pupae (0 dpi) |
| Hypoxia        |     |     |                 |
| ## 151 GmmNegV | 14A | 110 | 0 Pupae (0 dpi) |
| Normoxia       |     |     |                 |
| ## 152 GmmNegV | 14B | 110 | 0 Pupae (0 dpi) |
| Normoxia       |     |     |                 |
| ## 153 GmmNegV | 20A | 150 | 3 Adult (3 dpi) |
| Hypoxia        |     |     |                 |
| ## 154 GmmNegV | 20B | 150 | 3 Adult (3 dpi) |
| Hypoxia        |     |     |                 |
| ## 155 GmmNegV | 4A  | 110 | 3 Adult (3 dpi) |
| Hypoxia        |     |     |                 |
| ## 156 GmmNegV | 4B  | 110 | 3 Adult (3 dpi) |
| Hypoxia        |     |     |                 |
| ## 157 GmmNegV | 7A  | 110 | 3 Adult (3 dpi) |
| Normoxia       |     |     |                 |
| ## 158 GmmNegV | 7B  | 110 | 3 Adult (3 dpi) |
| Normoxia       |     |     |                 |
| ## 159 GmmNegV | 3A  | 110 | 0 Pupae (0 dpi) |
| Hypoxia        |     |     |                 |
| ## 160 GmmNegV | 3B  | 110 | 0 Pupae (0 dpi) |
| Hypoxia        |     |     |                 |
| ## 161 GmmNegV | 4A  | 110 | 3 Adult (3 dpi) |
| Normoxia       |     |     |                 |
| ## 162 GmmNegV | 4B  | 110 | 3 Adult (3 dpi) |
| Normoxia       |     |     |                 |
| ## 163 GmmNegV | 13A | 150 | 3 Adult (3 dpi) |
| Hypoxia        |     |     |                 |
| ## 164 GmmNegV | 13B | 150 | 3 Adult (3 dpi) |
| Hypoxia        |     |     |                 |
| ## 165 GmmNegV | 16A | 150 | 3 Adult (3 dpi) |
| Normoxia       |     |     |                 |
| ## 166 GmmNegV | 16B | 150 | 3 Adult (3 dpi) |
| Normoxia       |     |     |                 |
| ## 167 GmmNegV | 20A | 150 | 0 Pupae (0 dpi) |
| Hypoxia        |     |     |                 |

|                |     |     |                 |
|----------------|-----|-----|-----------------|
| ## 168 GmmNegV | 20B | 150 | 0 Pupae (0 dpi) |
| Hypoxia        |     |     |                 |
| ## 169 GmmNegV | 23A | 150 | 0 Pupae (0 dpi) |
| Normoxia       |     |     |                 |
| ## 170 GmmNegV | 23B | 150 | 0 Pupae (0 dpi) |
| Normoxia       |     |     |                 |
| ## 171 GmmNegV | 4A  | 150 | 0 Pupae (0 dpi) |
| Hypoxia        |     |     |                 |
| ## 172 GmmNegV | 4B  | 150 | 0 Pupae (0 dpi) |
| Hypoxia        |     |     |                 |
| ## 173 GmmNegV | 7A  | 150 | 0 Pupae (0 dpi) |
| Normoxia       |     |     |                 |
| ## 174 GmmNegV | 7B  | 150 | 0 Pupae (0 dpi) |
| Normoxia       |     |     |                 |
| ## 175 GmmNegV | 12A | 190 | 0 Pupae (0 dpi) |
| Hypoxia        |     |     |                 |
| ## 176 GmmNegV | 12B | 190 | 0 Pupae (0 dpi) |
| Hypoxia        |     |     |                 |
| ## 177 GmmNegV | 21A | 190 | 3 Adult (3 dpi) |
| Hypoxia        |     |     |                 |
| ## 178 GmmNegV | 21B | 190 | 3 Adult (3 dpi) |
| Hypoxia        |     |     |                 |
| ## 179 GmmNegV | 5A  | 150 | 3 Adult (3 dpi) |
| Hypoxia        |     |     |                 |
| ## 180 GmmNegV | 5B  | 150 | 3 Adult (3 dpi) |
| Hypoxia        |     |     |                 |
| ## 181 GmmNegV | 8A  | 150 | 3 Adult (3 dpi) |
| Normoxia       |     |     |                 |
| ## 182 GmmNegV | 8B  | 150 | 3 Adult (3 dpi) |
| Normoxia       |     |     |                 |
| ## 183 GmmNegV | 5A  | 150 | 3 Adult (3 dpi) |
| Normoxia       |     |     |                 |
| ## 184 GmmNegV | 5B  | 150 | 3 Adult (3 dpi) |
| Normoxia       |     |     |                 |
| ## 185 GmmNegV | 1A  | 0   | 0 Pupae (0 dpi) |
| Normoxia       |     |     |                 |
| ## 186 GmmNegV | 1B  | 0   | 0 Pupae (0 dpi) |
| Normoxia       |     |     |                 |

| ##     | Replicate | Expression | Mean.Cq  | Normalized_expression | Transformed |
|--------|-----------|------------|----------|-----------------------|-------------|
| ## 93  | 1         | 0.810200   | 26.68000 | 5.20627169            | 1.52094764  |
| ## 94  | 1         | 0.736340   | 26.76000 | 4.73165403            | 1.43950847  |
| ## 95  | 1         | 0.539510   | 26.91000 | 3.46684231            | 1.16906697  |
| ## 96  | 1         | 0.486370   | 27.07000 | 3.12536949            | 1.07702116  |
| ## 97  | 1         | 0.884310   | 27.01000 | 0.26036264            | -1.44042433 |
| ## 98  | 1         | 1.173400   | 26.50000 | 0.34547786            | -1.12136202 |
| ## 99  | 1         | 2.682830   | 28.13000 | 0.78989122            | -0.23866353 |
| ## 100 | 1         | 4.712670   | 28.02000 | 1.38752611            | 0.32221692  |
| ## 101 | 3         | 10.713230  | 24.32000 | 2.31479499            | 0.80506324  |
| ## 102 | 3         | 8.776540   | 24.43000 | 1.89633666            | 0.61987867  |
| ## 103 | 3         | 1.008980   | 27.78000 | 5.75491231            | 1.60547496  |

|        |   |            |          |              |             |
|--------|---|------------|----------|--------------|-------------|
| ## 104 | 3 | 0.903890   | 28.06000 | 5.15551119   | 1.51263603  |
| ## 105 | 3 | 0.625310   | 25.68000 | 3.56657636   | 1.19407774  |
| ## 106 | 3 | 0.455630   | 25.73000 | 2.59877371   | 0.91085245  |
| ## 107 | 2 | 1.484860   | 26.97000 | 0.06325263   | -3.17929376 |
| ## 108 | 2 | 1.411240   | 26.96000 | 0.06011654   | -3.24648346 |
| ## 109 | 2 | 1.865650   | 26.34000 | 0.33823712   | -1.14494355 |
| ## 110 | 2 | 1.666820   | 26.47000 | 0.30218980   | -1.27124838 |
| ## 111 | 2 | 1.121410   | 26.94000 | 0.20330849   | -1.72693311 |
| ## 112 | 2 | 1.065870   | 26.71000 | 0.19323925   | -1.78665215 |
| ## 113 | 3 | 5.410940   | 25.25000 | 30.86234137  | 2.90328911  |
| ## 114 | 3 | 4.805110   | 25.12000 | 27.40687295  | 2.81851841  |
| ## 115 | 1 | 0.218900   | 27.03000 | 1.40663154   | 0.33544271  |
| ## 116 | 1 | 0.200310   | 27.24000 | 1.28717389   | 0.24928915  |
| ## 117 | 1 | 118.914050 | 28.95000 | 764.13089580 | 4.85147028  |
| ## 118 | 1 | 105.121200 | 29.33000 | 675.49929310 | 4.78760271  |
| ## 119 | 2 | 42.612910  | 26.04000 | 1.81524102   | 0.57879247  |
| ## 120 | 2 | 43.930260  | 26.02000 | 1.87135800   | 0.60743277  |
| ## 121 | 1 | 1.126520   | 29.92000 | 0.33167523   | -1.16679892 |
| ## 122 | 1 | 0.983670   | 29.74000 | 0.28961667   | -1.31924979 |
| ## 123 | 1 | 11.207230  | 25.01000 | 3.29968452   | 1.12531886  |
| ## 124 | 1 | 7.844940   | 25.13000 | 2.30974354   | 0.80305427  |
| ## 125 | 3 | 2.495140   | 27.69000 | 0.53912196   | -0.63729731 |
| ## 126 | 3 | 0.610270   | 27.92000 | 0.13186032   | -2.24584019 |
| ## 127 | 3 | 9.263410   | 23.79000 | 2.00153409   | 0.67038546  |
| ## 128 | 3 | 4.944410   | 24.38000 | 1.06833285   | 0.06588137  |
| ## 129 | 3 | 11.921640  | 25.73000 | 67.99737630  | 3.44231148  |
| ## 130 | 3 | 1.895520   | 25.77000 | 10.81146442  | 2.11845159  |
| ## 131 | 3 | 0.236260   | 26.01000 | 1.34755454   | 0.29388652  |
| ## 132 | 3 | 0.182220   | 26.73000 | 1.03932696   | 0.03849905  |
| ## 133 | 2 | 1.013920   | 25.99000 | 0.18382086   | -1.84569432 |
| ## 134 | 2 | 0.968270   | 25.82000 | 0.17554464   | -1.90039133 |
| ## 135 | 2 | 2.080300   | 26.05000 | 0.37715256   | -1.02423071 |
| ## 136 | 2 | 1.804070   | 26.21000 | 0.32707284   | -1.18241362 |
| ## 137 | 2 | 118.911610 | 24.16000 | 5.06544219   | 1.49766400  |
| ## 138 | 2 | 68.661760  | 24.27000 | 2.92487988   | 1.01766607  |
| ## 139 | 1 | 0.769760   | 26.10000 | 4.94640792   | 1.47742156  |
| ## 140 | 1 | 0.647620   | 26.37000 | 4.16154736   | 1.32889359  |
| ## 141 | 1 | 0.279750   | 26.65000 | 1.79764812   | 0.56961265  |
| ## 142 | 1 | 0.267380   | 26.72000 | 1.71815962   | 0.52686668  |
| ## 143 | 2 | 54.450680  | 25.55000 | 2.31951087   | 0.80693441  |
| ## 144 | 2 | 48.545200  | 25.79000 | 2.06794697   | 0.70078990  |
| ## 145 | 1 | 11.190710  | 25.10000 | 3.29482063   | 1.12400963  |
| ## 146 | 1 | 13.006450  | 24.81000 | 3.82941920   | 1.25647192  |
| ## 147 | 1 | 1.223990   | 26.97000 | 0.36037280   | -1.07451714 |
| ## 148 | 1 | 1.026830   | 27.19000 | 0.30232404   | -1.27074779 |
| ## 149 | 3 | 17.661830  | 24.45000 | 3.81617081   | 1.25344121  |
| ## 150 | 3 | 11.874990  | 24.66000 | 2.56581510   | 0.89924413  |
| ## 151 | 3 | 0.305210   | 29.31000 | 0.06594637   | -3.12444399 |
| ## 152 | 3 | 0.805570   | 28.08000 | 0.17405856   | -1.91051283 |
| ## 153 | 3 | 1.214620   | 25.03000 | 6.92781976   | 1.75975087  |

|        |   |            |          |            |             |
|--------|---|------------|----------|------------|-------------|
| ## 154 | 3 | 0.416350   | 25.54000 | 2.37473264 | 0.82853891  |
| ## 155 | 2 | 2.048230   | 25.96000 | 0.37133836 | -1.04137139 |
| ## 156 | 2 | 2.110090   | 25.84000 | 0.38255341 | -1.00856706 |
| ## 157 | 2 | 0.226830   | 33.84000 | 0.04112364 | -3.75912578 |
| ## 158 | 2 | 0.134240   | 33.91000 | 0.02433734 | -4.50015672 |
| ## 159 | 2 | 35.677020  | 25.03000 | 1.51978333 | 0.40992878  |
| ## 160 | 2 | 25.724760  | 25.20000 | 1.09583315 | 0.09109747  |
| ## 161 | 3 | 0.238190   | 26.33000 | 1.35856267 | 0.30177999  |
| ## 162 | 3 | 0.186510   | 26.48000 | 1.06379581 | 0.06165263  |
| ## 163 | 1 | 0.545350   | 25.99000 | 3.50436962 | 1.17856965  |
| ## 164 | 1 | 0.455380   | 26.18000 | 2.92623056 | 1.01808076  |
| ## 165 | 1 | 0.600820   | 27.23000 | 3.86081480 | 1.26360819  |
| ## 166 | 1 | 0.522780   | 27.15000 | 3.35933685 | 1.14120515  |
| ## 167 | 2 | 106.814450 | 26.32000 | 4.55012275 | 1.40595371  |
| ## 168 | 2 | 74.982190  | 26.55000 | 3.19411998 | 1.09641565  |
| ## 169 | 2 | 101.249840 | 25.20000 | 4.31307937 | 1.35985054  |
| ## 170 | 2 | 111.280710 | 25.17000 | 4.74037820 | 1.44108525  |
| ## 171 | 1 | 0.661620   | 27.27000 | 0.19479722 | -1.77719115 |
| ## 172 | 1 | 0.553050   | 26.96000 | 0.16283154 | -1.99019225 |
| ## 173 | 1 | 3.077020   | 25.60000 | 0.90595047 | -0.09926004 |
| ## 174 | 1 | 2.600770   | 25.51000 | 0.76573074 | -0.27051903 |
| ## 175 | 3 | 6.392100   | 25.01000 | 1.38113352 | 0.31774685  |
| ## 176 | 3 | 4.698700   | 25.00000 | 1.01524258 | 0.01511614  |
| ## 177 | 3 | 0.254410   | 25.98000 | 1.45107657 | 0.36546038  |
| ## 178 | 3 | 0.304950   | 26.03000 | 1.73934122 | 0.53846673  |
| ## 179 | 2 | 31.843340  | 28.23000 | 5.77310837 | 1.60812456  |
| ## 180 | 2 | 19.297400  | 28.22000 | 3.49856458 | 1.17710704  |
| ## 181 | 2 | 5.681461   | 26.98748 | 1.03003300 | 0.02954710  |
| ## 182 | 2 | 6.501137   | 27.14410 | 1.17863801 | 0.16301621  |
| ## 183 | 3 | 1.130850   | 24.78000 | 6.45002139 | 1.70065374  |
| ## 184 | 3 | 0.798040   | 25.00000 | 4.55177527 | 1.40626577  |
| ## 185 | 2 | 37.974820  | 25.58000 | 1.61766589 | 0.46960025  |
| ## 186 | 2 | 35.922460  | 25.59000 | 1.53023867 | 0.41650142  |

```
#neg$Life_stage=as.factor(neg$Life_stage)
```

```
neg$Irradiation_dose=as.factor(neg$Irradiation_dose)
```

```
#select the model
```

```
anova(with(neg,lm(Transformed ~ Irradiation_dose)))
```

```
## Analysis of Variance Table
```

```
##
```

```
## Response: Transformed
```

```
##           Df Sum Sq Mean Sq F value Pr(>F)
```

```
## Irradiation_dose  4  12.81   3.2026   1.237  0.301
```

```
## Residuals      89 230.43   2.5891
```

```
anova(with(neg,lm(Transformed ~ Life_stage)))
```

```
## Analysis of Variance Table
```

```
##
```



```
## Response: Transformed
##           Df Sum Sq Mean Sq F value Pr(>F)
## Life_stage 1  10.905 10.9047  4.3181 0.0405 *
## Residuals 92 232.335  2.5254
## ---
## Signif. codes:  0 '***' 0.001 '**' 0.01 '*' 0.05 '.' 0.1 ' ' 1

anova(with(neg,lm(Transformed ~ Irradiation_conditions)))

## Analysis of Variance Table
##
## Response: Transformed
##           Df Sum Sq Mean Sq F value Pr(>F)
## Irradiation_conditions 1  0.009  0.0091  0.0034 0.9533
## Residuals              92 243.230  2.6438

anova(with(neg,lm(Transformed ~ Irradiation_dose +
Irradiation_conditions)))

## Analysis of Variance Table
##
## Response: Transformed
##           Df Sum Sq Mean Sq F value Pr(>F)
## Irradiation_dose      4  12.810  3.2026  1.2232 0.3068
## Irradiation_conditions 1  0.024  0.0243  0.0093 0.9234
## Residuals             88 230.405  2.6182

anova(with(neg,lm(Transformed ~ Irradiation_dose+Life_stage)))

## Analysis of Variance Table
##
## Response: Transformed
##           Df Sum Sq Mean Sq F value Pr(>F)
## Irradiation_dose      4  12.810  3.2026  1.2817 0.2833
## Life_stage            1  10.546 10.5462  4.2207 0.0429 *
## Residuals             88 219.883  2.4987
## ---
## Signif. codes:  0 '***' 0.001 '**' 0.01 '*' 0.05 '.' 0.1 ' ' 1

anova(with(neg,lm(Transformed ~
Irradiation_dose*Irradiation_conditions)))

## Analysis of Variance Table
##
## Response: Transformed
##           Df Sum Sq Mean Sq F value
Pr(>F)
## Irradiation_dose      4  12.810  3.2026  1.3288
0.26587
## Irradiation_conditions 1  0.024  0.0243  0.0101
0.92021
## Irradiation_dose:Irradiation_conditions 3  25.546  8.5154  3.5332
```

```

0.01817 *
## Residuals                                85 204.859  2.4101
## ---
## Signif. codes:  0 '***' 0.001 '**' 0.01 '*' 0.05 '.' 0.1 ' ' 1

anova(with(neg,lm(Transformed ~ Irradiation_dose*Life_stage)))

## Analysis of Variance Table
##
## Response: Transformed
##              Df  Sum Sq Mean Sq F value  Pr(>F)
## Irradiation_dose      4  12.810   3.2026   1.2537 0.29475
## Life_stage            1   10.546  10.5462   4.1285 0.04533 *
## Irradiation_dose:Life_stage  4   5.304   1.3261   0.5191 0.72189
## Residuals            84 214.578   2.5545
## ---
## Signif. codes:  0 '***' 0.001 '**' 0.01 '*' 0.05 '.' 0.1 ' ' 1

#-----
-----

mod1 <- lm(Transformed ~ Irradiation_dose + Irradiation_conditions,
data = neg)
mod2 <- lm(Transformed ~ Irradiation_dose * Irradiation_conditions,
data = neg)
mod3 <- lm(Transformed ~ Irradiation_dose + Life_stage +
Irradiation_conditions, data = neg)
mod4 <- lm(Transformed ~ Irradiation_dose * Life_stage *
Irradiation_conditions, data = neg)
mod5 <- lm(Transformed ~ Irradiation_dose + Life_stage, data = neg)
mod6 <- lm(Transformed ~ Irradiation_dose*Life_stage, data = neg)
mod7 <- lm(Transformed ~ Irradiation_dose, data = neg)
mod8 <- lm(Transformed ~ Irradiation_conditions, data = neg)
mod9 <- lm(Transformed ~ Life_stage, data = neg)
mod10<- lm(Transformed ~ Irradiation_dose+Life_stage, data = neg)

AICc(mod1,mod2,mod3,mod4,mod5,mod6,mod7,mod8,mod9, mod10)

##      df      AICc
## mod1   7 366.3377
## mod2  10 362.6394
## mod3   8 364.3339
## mod4  19 375.4282
## mod5   7 361.9439
## mod6  11 369.5657
## mod7   6 364.0109
## mod8   3 362.3942
## mod9   3 358.0862
## mod10  7 361.9439

```

```
anova(mod8, mod9)
```

```
## Analysis of Variance Table
```

```
##
```

```
## Model 1: Transformed ~ Irradiation_conditions
```

```
## Model 2: Transformed ~ Life_stage
```

```
##   Res.Df    RSS Df Sum of Sq F Pr(>F)
```

```
## 1      92 243.23
```

```
## 2      92 232.34  0    10.896
```

*##no difference, choose either model but went for the lowest*

```
summary(mod8)
```

```
##
```

```
## Call:
```

```
## lm(formula = Transformed ~ Irradiation_conditions, data = neg)
```

```
##
```

```
## Residuals:
```

```
##      Min       1Q   Median       3Q      Max
```

```
## -4.7611 -1.2745  0.2815  0.9369  4.5905
```

```
##
```

```
## Coefficients:
```

```
##              Estimate Std. Error t value Pr(>|t|)
```

```
## (Intercept)      0.24128    0.23469   1.028   0.307
```

```
## Irradiation_conditionsNormoxia  0.01968    0.33549   0.059   0.953
```

```
##
```

```
## Residual standard error: 1.626 on 92 degrees of freedom
```

```
## Multiple R-squared:  3.742e-05, Adjusted R-squared:  -0.01083
```

```
## F-statistic: 0.003443 on 1 and 92 DF, p-value: 0.9533
```

```
summary(mod9)
```

```
##
```

```
## Call:
```

```
## lm(formula = Transformed ~ Life_stage, data = neg)
```

```
##
```

```
## Residuals:
```

```
##      Min       1Q   Median       3Q      Max
```

```
## -5.0706 -0.9975  0.4321  0.9186  4.2810
```

```
##
```

```
## Coefficients:
```

```
##              Estimate Std. Error t value Pr(>|t|)
```

```
## (Intercept)      0.5704    0.2247   2.538  0.0128 *
```

```
## Life_stagePupae (0 dpi) -0.6826    0.3285  -2.078  0.0405 *
```

```
## ---
```

```
## Signif. codes:  0 '***' 0.001 '**' 0.01 '*' 0.05 '.' 0.1 ' ' 1
```

```
##
```

```
## Residual standard error: 1.589 on 92 degrees of freedom
```

```
## Multiple R-squared:  0.04483, Adjusted R-squared:  0.03445
```

```
## F-statistic: 4.318 on 1 and 92 DF, p-value: 0.0405
```

```

#-----
#=====

neg$Irradiation_dose=as.factor(neg$Irradiation_dose)

label_parse <- function(breaks) {parse(text = breaks)}

Fig3a<-ggplot(neg,aes(x=Irradiation_dose,y=Transformed,
fill=Irradiation_dose)) +
  geom_boxplot() + geom_jitter(width=0.1,alpha=0.2)+
  scale_y_continuous(labels = label_parse)
Fig3a

```

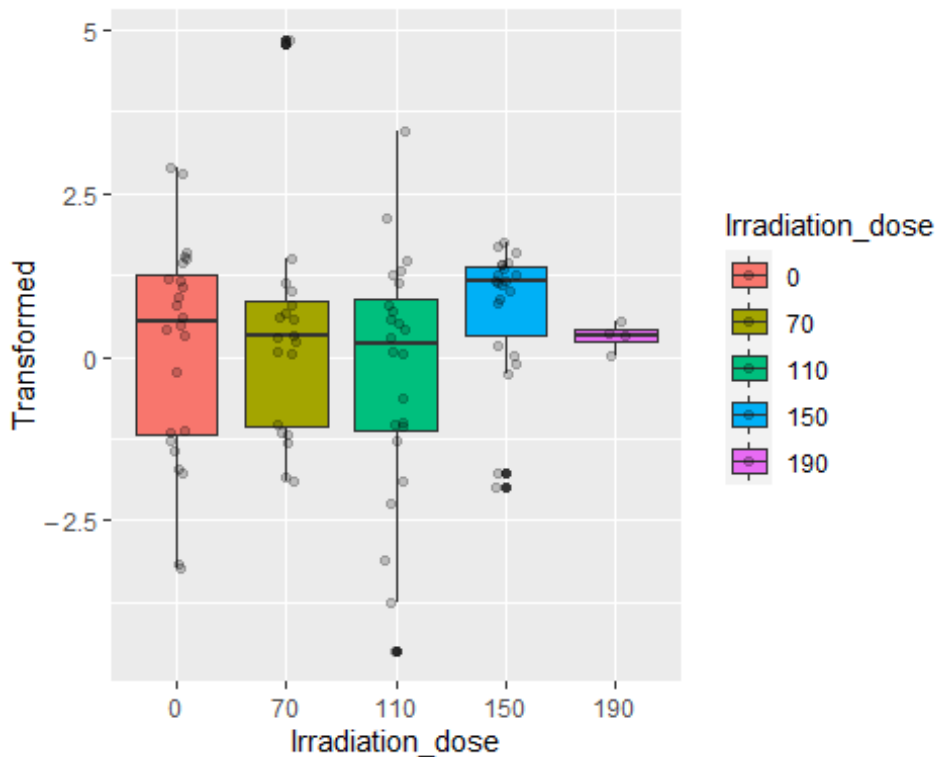

```

tiff("Fig 3a.tiff", width = 4, height = 4, units = 'in', res = 300)
plot(Fig3a+theme_tufte() + theme(axis.line = element_line(size = 1,
colour = "black")) + theme(axis.text.x = element_blank()))
+theme(legend.title = element_text(face = "bold")) + theme(legend.text
= element_text(face = "plain"))) + xlab(expression(bold("Irradiation
doses (Gy)"))) + ylab(expression (bold("Transformed relative GmmNegeV
density"))))
dev.off()

## png
## 2

```

```
###Irradiation_conditions
```

```
#neg$Irradiation_conditions=as.factor(neg$Irradiation_conditions)
```

```
label_parse <- function(breaks) {parse(text = breaks)}
```

```
Fig3b<-ggplot(neg,aes(x=Irradiation_conditions,y=Transformed,  
fill=Irradiation_conditions)) +  
  geom_boxplot() + geom_jitter(width=0.1,alpha=0.2)+  
  scale_y_continuous(labels = label_parse)  
Fig3b
```

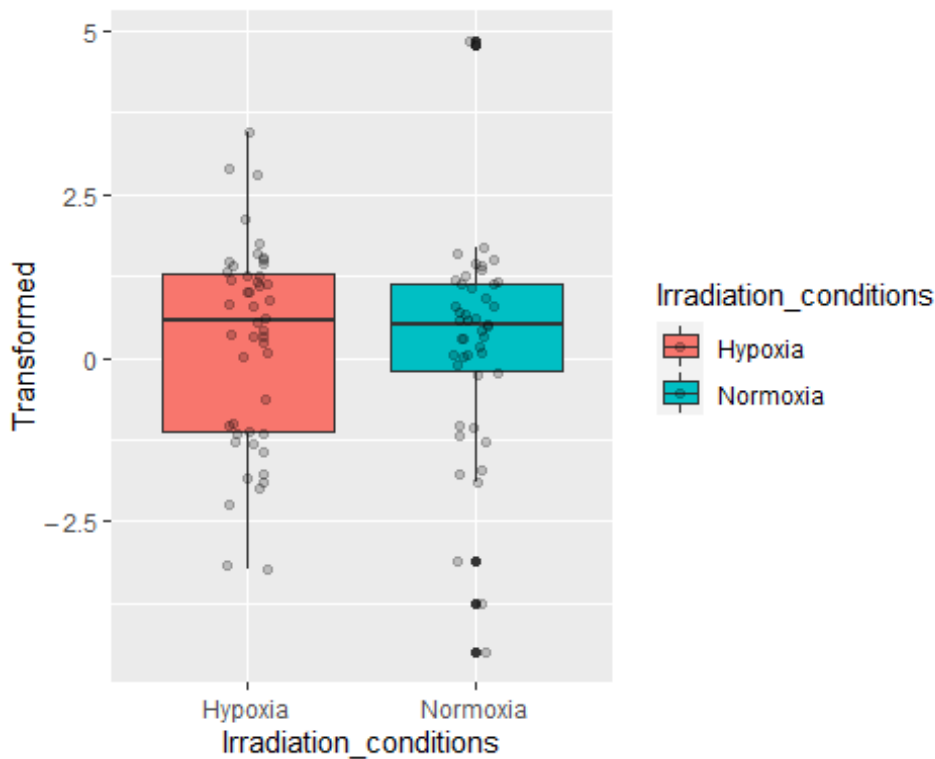

```
tiff("Fig 3b.tiff", width = 4, height = 4, units = 'in', res = 300)  
plot(Fig3b+theme_tufte() + theme(axis.line = element_line(size = 1,  
colour = "black")) + theme(axis.text.x = element_blank())  
+theme(legend.title = element_text(face = "bold")) + theme(legend.text  
= element_text(face = "plain"))) + xlab(expression(bold("Irradiation  
status")))) + ylab(expression (bold("Transformed relative GmmNegeV  
density"))))  
dev.off()
```

```
## png
```

```
## 2
```

```
###Days_post.irradiation
```

```
###neg$Life_stage=as.factor(neg$Life_stage)
```

```
label_parse <- function(breaks) {parse(text = breaks)}
```

```
Fig3c<-ggplot(neg,aes(x=Life_stage,y=Transformed, fill=Life_stage)) +
  geom_boxplot() + geom_jitter(width=0.1,alpha=0.2)+
  scale_y_continuous(labels = label_parse)
Fig3c
```

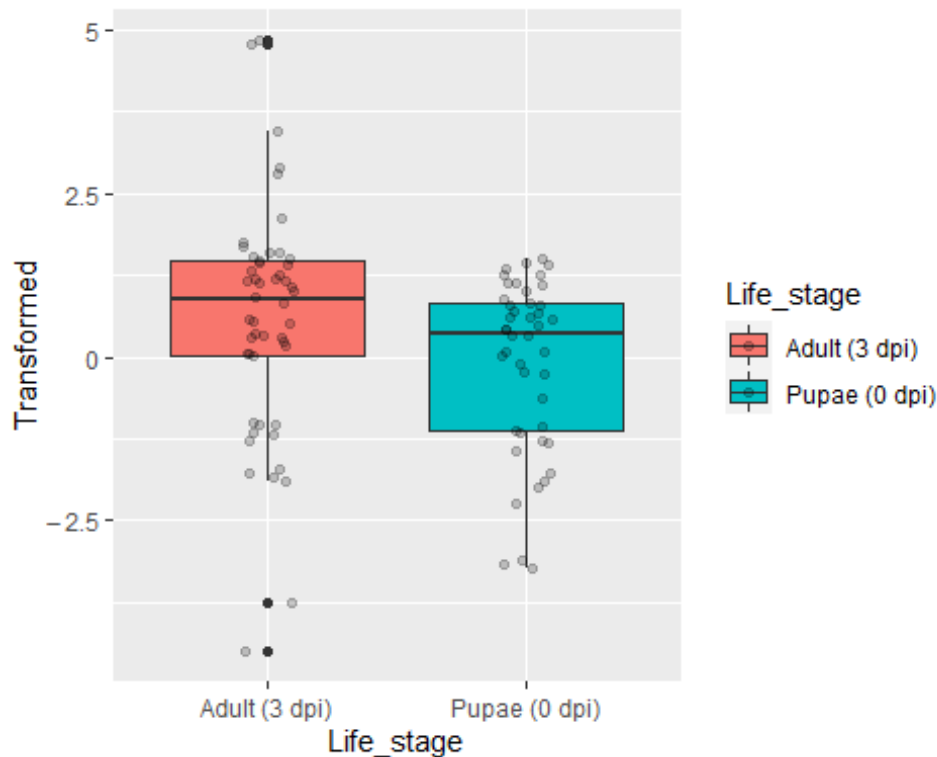

```
tiff("Fig 3c.tiff", width = 4, height = 4, units = 'in', res = 300)
plot(Fig3c+theme_tufte() + theme(axis.line = element_line(size = 1,
colour = "black")) + theme(axis.text.x = element_blank())
+theme(legend.title = element_text(face = "bold")) + theme(legend.text
= element_text(face = "plain")))) + xlab(expression(bold("Days post
irradiation")))) + ylab(expression (bold("Transformed relative GmmNegeV
density"))))
dev.off()
```

```
## png
## 2
```

```
###Irradiation dose according to irradiation status
label_parse <- function(breaks) {parse(text = breaks)}
```

```
Fig4a<-ggplot(neg, aes(x=Irradiation_dose,y=Transformed,
colour=Irradiation_conditions)) +
  geom_boxplot(position=position_dodge(0.8))+
  geom_jitter(position=position_dodge(0.8))+ scale_y_continuous(labels
= label_parse)
```

Fig4a

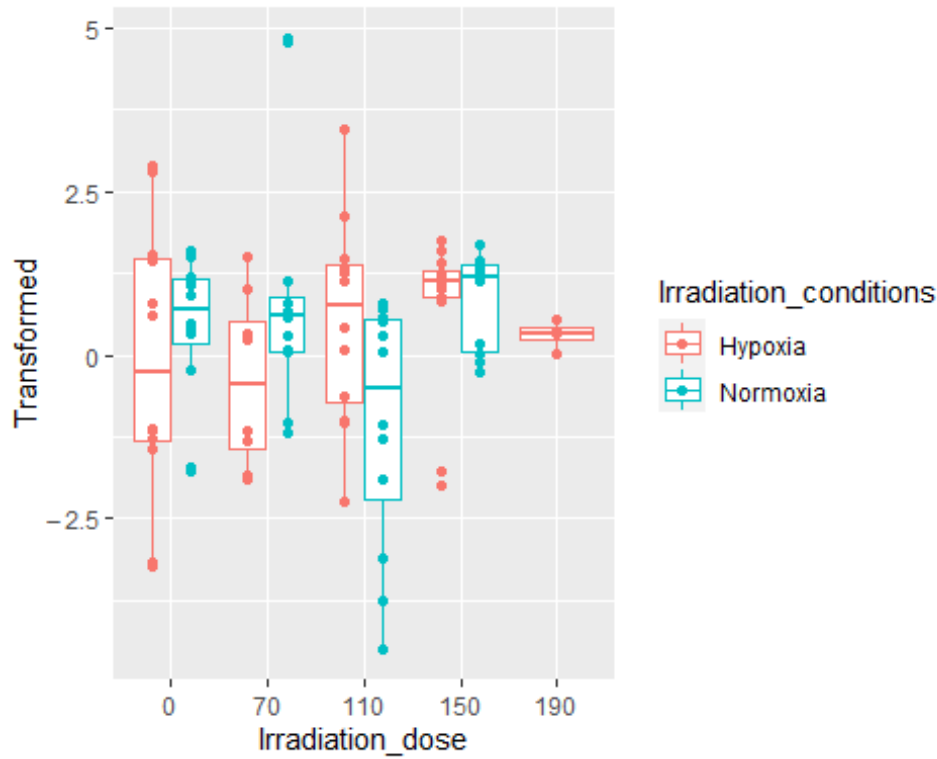

```
tiff("Fig 4a.tiff", width = 7, height = 4, units = 'in',compression =
'lwz',res = 300)
plot(Fig4a+theme_tufte() + theme(axis.line = element_line(size = 1,
colour = "black")) + theme(legend.title= element_text(face = "bold")) +
theme(legend.text = element_text(face = "plain"))) + theme(axis.text.x
= element_text(colour = "black")) + theme(axis.text.y =
element_text(colour = "black")) + xlab(expression(bold("Irradiation
dose (Gy)")))) + ylab(expression(bold("GmmNegeV_ ")~bold("Transformed
normalized density"))))
dev.off()
```

```
## png
## 2
```

**###Irradiation dose according to days post irradiation**

```
label_parse <- function(breaks) {parse(text = breaks)}
```

```
Fig4b<-ggplot(neg, aes(x=Irradiation_dose,y=Transformed,
colour=Life_stage)) +
  geom_boxplot(position=position_dodge(0.8))+
  geom_jitter(position=position_dodge(0.8))+ scale_y_continuous(labels
= label_parse)
```

Fig4b

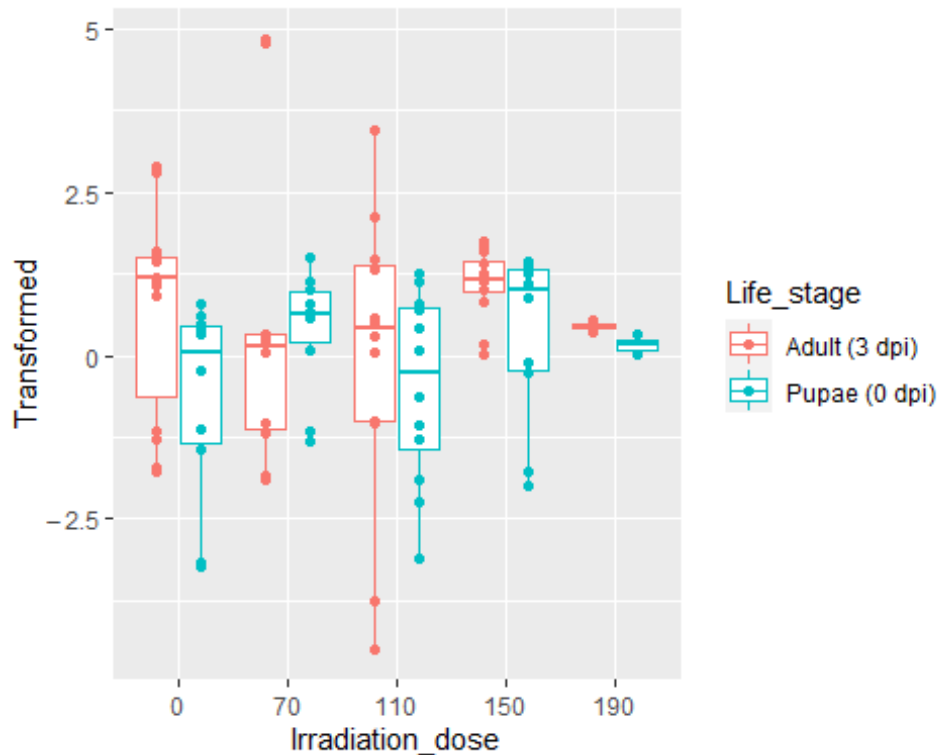

```
tiff("Fig 4b.tiff", width = 7, height = 4, units = 'in',compression =
'lzw',res = 300)
plot(Fig4b+theme_tufte() + theme(axis.line = element_line(size = 1,
colour = "black")) + theme(legend.title= element_text(face = "bold")) +
theme(legend.text = element_text(face = "plain"))) + theme(axis.text.x
= element_text(colour = "black")) + theme(axis.text.y =
element_text(colour = "black")) + xlab(expression(bold("Irradiation
dose (Gy)")))) + ylab(expression(bold ("GmmNegV_ ")~bold("Transformed
normalized density"))))
dev.off()
```

```
## png
## 2
```

```
#-----
```

```
#GmmNegV-Normoxia
```

```
#-----
```

```
#NegNorm<- read.csv("GmmNegV_alldata_normalized.csv")
```

```
NegNorm<- subset(neg, Irradiation_conditions=="Normoxia")
```

```
NegNorm
```

```
##      Target Sample Irradiation_dose Dpi    Life_stage
Irradiation_conditions
## 95  GmmNegV    18A                0    3 Adult (3 dpi)
Normoxia
## 96  GmmNegV    18B                0    3 Adult (3 dpi)
```



|                |     |     |   |               |
|----------------|-----|-----|---|---------------|
| Normoxia       |     |     |   |               |
| ## 99 GmmNegV  | 9A  | 0   | 0 | Pupae (0 dpi) |
| Normoxia       |     |     |   |               |
| ## 100 GmmNegV | 9B  | 0   | 0 | Pupae (0 dpi) |
| Normoxia       |     |     |   |               |
| ## 103 GmmNegV | 17A | 0   | 3 | Adult (3 dpi) |
| Normoxia       |     |     |   |               |
| ## 104 GmmNegV | 17B | 0   | 3 | Adult (3 dpi) |
| Normoxia       |     |     |   |               |
| ## 105 GmmNegV | 6A  | 0   | 3 | Adult (3 dpi) |
| Normoxia       |     |     |   |               |
| ## 106 GmmNegV | 6B  | 0   | 3 | Adult (3 dpi) |
| Normoxia       |     |     |   |               |
| ## 111 GmmNegV | 3a  | 0   | 3 | Adult (3 dpi) |
| Normoxia       |     |     |   |               |
| ## 112 GmmNegV | 3b  | 0   | 3 | Adult (3 dpi) |
| Normoxia       |     |     |   |               |
| ## 117 GmmNegV | 14A | 70  | 3 | Adult (3 dpi) |
| Normoxia       |     |     |   |               |
| ## 118 GmmNegV | 14B | 70  | 3 | Adult (3 dpi) |
| Normoxia       |     |     |   |               |
| ## 119 GmmNegV | 21A | 70  | 0 | Pupae (0 dpi) |
| Normoxia       |     |     |   |               |
| ## 120 GmmNegV | 21B | 70  | 0 | Pupae (0 dpi) |
| Normoxia       |     |     |   |               |
| ## 123 GmmNegV | 5A  | 70  | 0 | Pupae (0 dpi) |
| Normoxia       |     |     |   |               |
| ## 124 GmmNegV | 5B  | 70  | 0 | Pupae (0 dpi) |
| Normoxia       |     |     |   |               |
| ## 127 GmmNegV | 13A | 70  | 0 | Pupae (0 dpi) |
| Normoxia       |     |     |   |               |
| ## 128 GmmNegV | 13B | 70  | 0 | Pupae (0 dpi) |
| Normoxia       |     |     |   |               |
| ## 131 GmmNegV | 22A | 70  | 3 | Adult (3 dpi) |
| Normoxia       |     |     |   |               |
| ## 132 GmmNegV | 22B | 70  | 3 | Adult (3 dpi) |
| Normoxia       |     |     |   |               |
| ## 135 GmmNegV | 6A  | 70  | 3 | Adult (3 dpi) |
| Normoxia       |     |     |   |               |
| ## 136 GmmNegV | 6B  | 70  | 3 | Adult (3 dpi) |
| Normoxia       |     |     |   |               |
| ## 141 GmmNegV | 15A | 110 | 3 | Adult (3 dpi) |
| Normoxia       |     |     |   |               |
| ## 142 GmmNegV | 15B | 110 | 3 | Adult (3 dpi) |
| Normoxia       |     |     |   |               |
| ## 143 GmmNegV | 22A | 110 | 0 | Pupae (0 dpi) |
| Normoxia       |     |     |   |               |
| ## 144 GmmNegV | 22B | 110 | 0 | Pupae (0 dpi) |
| Normoxia       |     |     |   |               |
| ## 147 GmmNegV | 6A  | 110 | 0 | Pupae (0 dpi) |

| Normoxia       |           |            |          |                       |             |
|----------------|-----------|------------|----------|-----------------------|-------------|
| ## 148 GmmNegV | 6B        |            | 110      | 0 Pupae (0 dpi)       |             |
| Normoxia       |           |            |          |                       |             |
| ## 151 GmmNegV | 14A       |            | 110      | 0 Pupae (0 dpi)       |             |
| Normoxia       |           |            |          |                       |             |
| ## 152 GmmNegV | 14B       |            | 110      | 0 Pupae (0 dpi)       |             |
| Normoxia       |           |            |          |                       |             |
| ## 157 GmmNegV | 7A        |            | 110      | 3 Adult (3 dpi)       |             |
| Normoxia       |           |            |          |                       |             |
| ## 158 GmmNegV | 7B        |            | 110      | 3 Adult (3 dpi)       |             |
| Normoxia       |           |            |          |                       |             |
| ## 161 GmmNegV | 4A        |            | 110      | 3 Adult (3 dpi)       |             |
| Normoxia       |           |            |          |                       |             |
| ## 162 GmmNegV | 4B        |            | 110      | 3 Adult (3 dpi)       |             |
| Normoxia       |           |            |          |                       |             |
| ## 165 GmmNegV | 16A       |            | 150      | 3 Adult (3 dpi)       |             |
| Normoxia       |           |            |          |                       |             |
| ## 166 GmmNegV | 16B       |            | 150      | 3 Adult (3 dpi)       |             |
| Normoxia       |           |            |          |                       |             |
| ## 169 GmmNegV | 23A       |            | 150      | 0 Pupae (0 dpi)       |             |
| Normoxia       |           |            |          |                       |             |
| ## 170 GmmNegV | 23B       |            | 150      | 0 Pupae (0 dpi)       |             |
| Normoxia       |           |            |          |                       |             |
| ## 173 GmmNegV | 7A        |            | 150      | 0 Pupae (0 dpi)       |             |
| Normoxia       |           |            |          |                       |             |
| ## 174 GmmNegV | 7B        |            | 150      | 0 Pupae (0 dpi)       |             |
| Normoxia       |           |            |          |                       |             |
| ## 181 GmmNegV | 8A        |            | 150      | 3 Adult (3 dpi)       |             |
| Normoxia       |           |            |          |                       |             |
| ## 182 GmmNegV | 8B        |            | 150      | 3 Adult (3 dpi)       |             |
| Normoxia       |           |            |          |                       |             |
| ## 183 GmmNegV | 5A        |            | 150      | 3 Adult (3 dpi)       |             |
| Normoxia       |           |            |          |                       |             |
| ## 184 GmmNegV | 5B        |            | 150      | 3 Adult (3 dpi)       |             |
| Normoxia       |           |            |          |                       |             |
| ## 185 GmmNegV | 1A        |            | 0        | 0 Pupae (0 dpi)       |             |
| Normoxia       |           |            |          |                       |             |
| ## 186 GmmNegV | 1B        |            | 0        | 0 Pupae (0 dpi)       |             |
| Normoxia       |           |            |          |                       |             |
| ##             | Replicate | Expression | Mean.Cq  | Normalized_expression | Transformed |
| ## 95          | 1         | 0.539510   | 26.91000 | 3.46684231            | 1.16906697  |
| ## 96          | 1         | 0.486370   | 27.07000 | 3.12536949            | 1.07702116  |
| ## 99          | 1         | 2.682830   | 28.13000 | 0.78989122            | -0.23866353 |
| ## 100         | 1         | 4.712670   | 28.02000 | 1.38752611            | 0.32221692  |
| ## 103         | 3         | 1.008980   | 27.78000 | 5.75491231            | 1.60547496  |
| ## 104         | 3         | 0.903890   | 28.06000 | 5.15551119            | 1.51263603  |
| ## 105         | 3         | 0.625310   | 25.68000 | 3.56657636            | 1.19407774  |
| ## 106         | 3         | 0.455630   | 25.73000 | 2.59877371            | 0.91085245  |
| ## 111         | 2         | 1.121410   | 26.94000 | 0.20330849            | -1.72693311 |
| ## 112         | 2         | 1.065870   | 26.71000 | 0.19323925            | -1.78665215 |

```
## 117      1 118.914050 28.95000      764.13089580  4.85147028
## 118      1 105.121200 29.33000      675.49929310  4.78760271
## 119      2  42.612910 26.04000        1.81524102  0.57879247
## 120      2  43.930260 26.02000        1.87135800  0.60743277
## 123      1  11.207230 25.01000        3.29968452  1.12531886
## 124      1   7.844940 25.13000        2.30974354  0.80305427
## 127      3   9.263410 23.79000        2.00153409  0.67038546
## 128      3   4.944410 24.38000        1.06833285  0.06588137
## 131      3   0.236260 26.01000        1.34755454  0.29388652
## 132      3   0.182220 26.73000        1.03932696  0.03849905
## 135      2   2.080300 26.05000        0.37715256 -1.02423071
## 136      2   1.804070 26.21000        0.32707284 -1.18241362
## 141      1   0.279750 26.65000        1.79764812  0.56961265
## 142      1   0.267380 26.72000        1.71815962  0.52686668
## 143      2  54.450680 25.55000        2.31951087  0.80693441
## 144      2  48.545200 25.79000        2.06794697  0.70078990
## 147      1   1.223990 26.97000        0.36037280 -1.07451714
## 148      1   1.026830 27.19000        0.30232404 -1.27074779
## 151      3   0.305210 29.31000        0.06594637 -3.12444399
## 152      3   0.805570 28.08000        0.17405856 -1.91051283
## 157      2   0.226830 33.84000        0.04112364 -3.75912578
## 158      2   0.134240 33.91000        0.02433734 -4.50015672
## 161      3   0.238190 26.33000        1.35856267  0.30177999
## 162      3   0.186510 26.48000        1.06379581  0.06165263
## 165      1   0.600820 27.23000        3.86081480  1.26360819
## 166      1   0.522780 27.15000        3.35933685  1.14120515
## 169      2 101.249840 25.20000        4.31307937  1.35985054
## 170      2 111.280710 25.17000        4.74037820  1.44108525
## 173      1   3.077020 25.60000        0.90595047 -0.09926004
## 174      1   2.600770 25.51000        0.76573074 -0.27051903
## 181      2   5.681461 26.98748        1.03003300  0.02954710
## 182      2   6.501137 27.14410        1.17863801  0.16301621
## 183      3   1.130850 24.78000        6.45002139  1.70065374
## 184      3   0.798040 25.00000        4.55177527  1.40626577
## 185      2  37.974820 25.58000        1.61766589  0.46960025
## 186      2  35.922460 25.59000        1.53023867  0.41650142
```

```
#-----
anova(with(NegNorm,lm(Transformed~ Life_stage*Irradiation_dose)))

## Analysis of Variance Table
##
## Response: Transformed
##
##              Df Sum Sq Mean Sq F value Pr(>F)
## Life_stage      1  1.305   1.3045   0.5080  0.4804
## Irradiation_dose  3 29.635   9.8783   3.8467  0.0169 *
## Life_stage:Irradiation_dose  3  0.993   0.3309   0.1289  0.9424
## Residuals      38 97.582   2.5680
## ---
## Signif. codes:  0 '***' 0.001 '**' 0.01 '*' 0.05 '.' 0.1 ' ' 1
```

```

anova(with(NegNorm,lm(Transformed~ Life_stage +Irradiation_dose)))

## Analysis of Variance Table
##
## Response: Transformed
##              Df Sum Sq Mean Sq F value    Pr(>F)
## Life_stage      1  1.305   1.3045    0.5426  0.46556
## Irradiation_dose 3 29.635   9.8783    4.1086  0.01226 *
## Residuals      41 98.575    2.4043
## ---
## Signif. codes:  0 '***' 0.001 '**' 0.01 '*' 0.05 '.' 0.1 ' ' 1

anova(with(NegNorm,lm(Transformed~ Life_stage)))

## Analysis of Variance Table
##
## Response: Transformed
##              Df Sum Sq Mean Sq F value    Pr(>F)
## Life_stage      1  1.305   1.3045    0.4477  0.5069
## Residuals      44 128.210    2.9139

anova(with(NegNorm,lm(Transformed~ Irradiation_dose)))

## Analysis of Variance Table
##
## Response: Transformed
##              Df Sum Sq Mean Sq F value    Pr(>F)
## Irradiation_dose 3 30.132  10.0441    4.2447  0.01045 *
## Residuals      42 99.382    2.3662
## ---
## Signif. codes:  0 '***' 0.001 '**' 0.01 '*' 0.05 '.' 0.1 ' ' 1

mod1 <- lm(Transformed ~ Irradiation_dose, data = NegNorm)
mod5 <- lm(Transformed~ Irradiation_dose+Life_stage, data = NegNorm)
mod6 <- lm(Transformed ~ Irradiation_dose*Life_stage, data = NegNorm)
mod11 <- lm(Transformed ~Life_stage, data = NegNorm)

AICc(mod1, mod5, mod6, mod11)

##           df      AICc
## mod1      5 177.4776
## mod5      6 179.7564
## mod6      9 188.1370
## mod11     3 184.2651

anova(mod1, mod5)

## Analysis of Variance Table
##
## Model 1: Transformed ~ Irradiation_dose
## Model 2: Transformed ~ Irradiation_dose + Life_stage

```

```
##   Res.Df    RSS Df Sum of Sq      F Pr(>F)
## 1      42 99.382
## 2      41 98.575   1   0.80711 0.3357 0.5655

summary(mod1)

##
## Call:
## lm(formula = Transformed ~ Irradiation_dose, data = NegNorm)
##
## Residuals:
##      Min       1Q   Median       3Q      Max
## -3.4442 -0.8369 -0.0062  0.7774  3.8835
##
## Coefficients:
##              Estimate Std. Error t value Pr(>|t|)
## (Intercept)      0.4104      0.4441   0.924   0.3606
## Irradiation_dose70  0.5575      0.6280   0.888   0.3797
## Irradiation_dose110 -1.4664      0.6280  -2.335   0.0244 *
## Irradiation_dose150  0.4031      0.6586   0.612   0.5438
## ---
## Signif. codes:  0 '***' 0.001 '**' 0.01 '*' 0.05 '.' 0.1 ' ' 1
##
## Residual standard error: 1.538 on 42 degrees of freedom
## Multiple R-squared:  0.2327, Adjusted R-squared:  0.1778
## F-statistic: 4.245 on 3 and 42 DF,  p-value: 0.01045

#-----

#FIGURE_normoxia
####NegNorm$Life_stage=as.factor(NegNorm$Life_stage)

label_parse <- function(breaks) {parse(text = breaks)}

FigsS3A<-ggplot(NegNorm, aes(x=Irradiation_dose,y=Transformed, colour=
Life_stage
)) +geom_boxplot(position=position_dodge(0.8))+
  geom_jitter(position=position_dodge(0.8))+ scale_y_continuous(labels
= label_parse)

FigsS3A
```

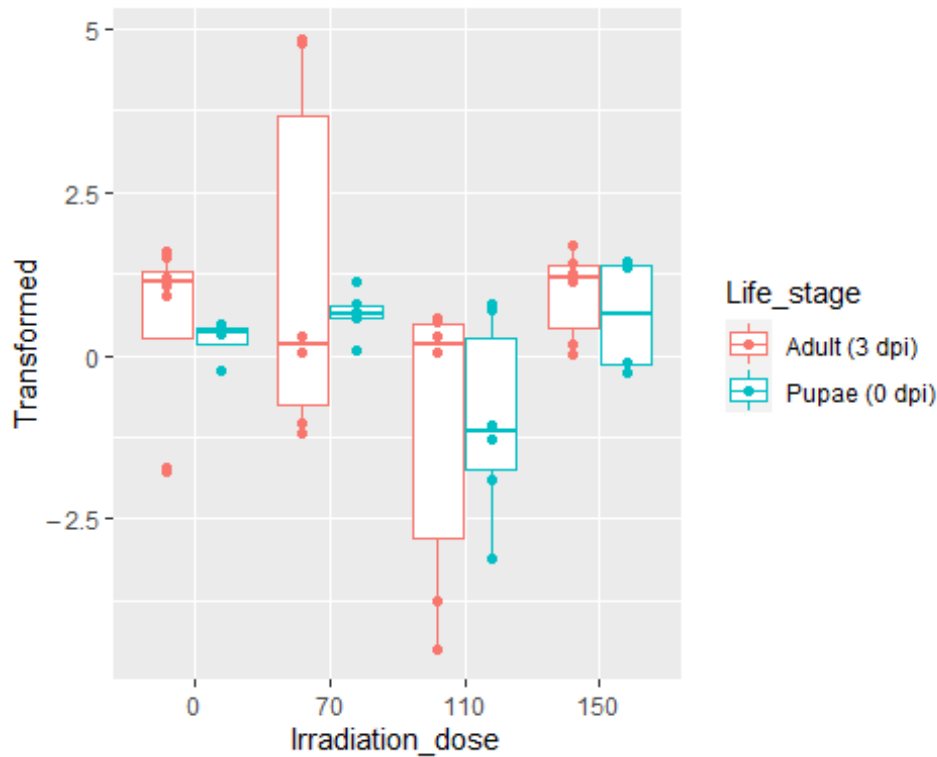

```
tiff("Fig S3A.tiff", width = 7, height = 4, units = 'in',compression =
'lzw',res = 300)
plot(FigsS3A+theme_tufte() + theme(axis.line = element_line(size = 1,
colour = "black")) + theme(legend.title= element_text(face = "bold")) +
theme(legend.text = element_text(face = "plain"))) + theme(axis.text.x
= element_text(colour = "black")) + theme(axis.text.y =
element_text(colour = "black")) + xlab(expression(bold("Irradiation
dose (Gy)")))) + ylab(expression(bold("GmmNegeV_ ")~bold("Normoxia
transformed relative density"))))
dev.off()

## png
## 2

#-----
#NegHypox <- read.csv("GmmNegV_alldata_normalized.csv")
NegHypox <- subset(neg , Irradiation_conditions=="Hypoxia")

#-----
---
anova(with(NegHypox,lm(Transformed~ Life_stage+Irradiation_dose)))

## Analysis of Variance Table
##
## Response: Transformed
##
##           Df Sum Sq Mean Sq F value    Pr(>F)
## Life_stage  1 12.211  12.2113    5.4991 0.02383 *
```

```

## Irradiation_dose 4 8.239 2.0598 0.9276 0.45711
## Residuals      42 93.265 2.2206
## ---
## Signif. codes:  0 '***' 0.001 '**' 0.01 '*' 0.05 '.' 0.1 ' ' 1

anova(with(NegHypox,lm(Transformed~ Life_stage*Irradiation_dose)))

## Analysis of Variance Table
##
## Response: Transformed
##              Df Sum Sq Mean Sq F value Pr(>F)
## Life_stage      1 12.211 12.2113   5.7190 0.02184 *
## Irradiation_dose 4  8.239  2.0598   0.9647 0.43804
## Life_stage:Irradiation_dose 4 12.127  3.0318   1.4199 0.24602
## Residuals      38 81.138  2.1352
## ---
## Signif. codes:  0 '***' 0.001 '**' 0.01 '*' 0.05 '.' 0.1 ' ' 1

anova(with(NegHypox,lm(Transformed~ Life_stage)))

## Analysis of Variance Table
##
## Response: Transformed
##              Df Sum Sq Mean Sq F value Pr(>F)
## Life_stage      1 12.211 12.2113   5.534 0.02299 *
## Residuals      46 101.504  2.2066
## ---
## Signif. codes:  0 '***' 0.001 '**' 0.01 '*' 0.05 '.' 0.1 ' ' 1

anova(with(NegHypox,lm(Transformed~ Irradiation_dose)))

## Analysis of Variance Table
##
## Response: Transformed
##              Df Sum Sq Mean Sq F value Pr(>F)
## Irradiation_dose 4  8.239  2.0598   0.8397 0.5076
## Residuals      43 105.476  2.4529

mod1 <- lm(Transformed ~ Irradiation_dose, data = NegHypox)
mod5 <- lm(Transformed~ Irradiation_dose+Life_stage, data = NegHypox)
mod6 <- lm(Transformed ~ Irradiation_dose*Life_stage, data = NegHypox)
mod11 <- lm(Transformed ~Life_stage, data = NegHypox)

AICc(mod1, mod5, mod6, mod11)

##          df      AICc
## mod1      6 188.0566
## mod5      7 184.9018
## mod6     11 190.7488
## mod11     3 178.7108

anova(mod11,mod5)

```

```

## Analysis of Variance Table
##
## Model 1: Transformed ~ Life_stage
## Model 2: Transformed ~ Irradiation_dose + Life_stage
##   Res.Df    RSS Df Sum of Sq    F Pr(>F)
## 1      46 101.504
## 2      42  93.265  4    8.2394 0.9276 0.4571

summary(mod11)

##
## Call:
## lm(formula = Transformed ~ Life_stage, data = NegHypox)
##
## Residuals:
##      Min       1Q   Median       3Q      Max
## -2.9834 -1.0864  0.3928  1.0917  2.6966
##
## Coefficients:
##              Estimate Std. Error t value Pr(>|t|)
## (Intercept)      0.7457     0.3032   2.459   0.0177 *
## Life_stagePupae (0 dpi) -1.0088     0.4288  -2.352   0.0230 *
## ---
## Signif. codes:  0 '***' 0.001 '**' 0.01 '*' 0.05 '.' 0.1 ' ' 1
##
## Residual standard error: 1.485 on 46 degrees of freedom
## Multiple R-squared:  0.1074, Adjusted R-squared:  0.08798
## F-statistic: 5.534 on 1 and 46 DF,  p-value: 0.02299

#-----

###Figure hypoxia
label_parse <- function(breaks) {parse(text = breaks)}

FigS3B<-ggplot(NegHypox, aes(x=Irradiation_dose,y=Transformed, colour=
Life_stage)) +
  geom_boxplot(position=position_dodge(0.8))+
  geom_jitter(position=position_dodge(0.8))+ scale_y_continuous(labels
= label_parse)

FigS3B

```



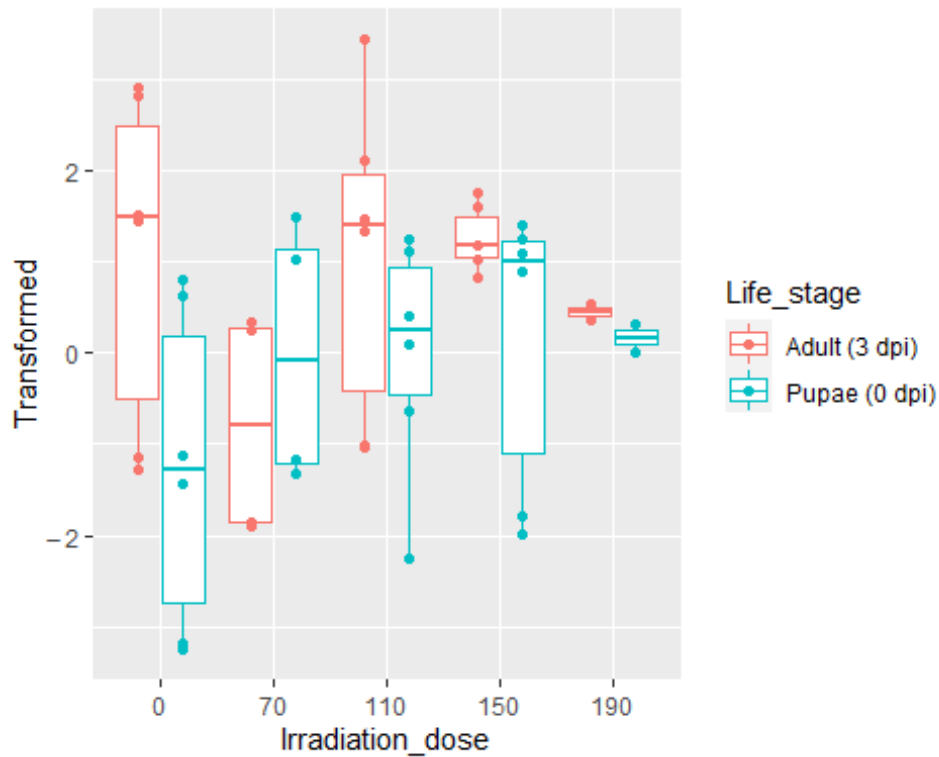

```
tiff("Fig S3B.tiff", width = 7, height = 4, units = 'in',compression =
'lzw',res = 300)
plot(FigS3B+theme_tufte() + theme(axis.line = element_line(size = 1,
colour = "black")) + theme(legend.title= element_text(face = "bold")) +
theme(legend.text = element_text(face = "plain"))) + theme(axis.text.x
= element_text(colour = "black")) + theme(axis.text.y =
element_text(colour = "black")) + xlab(expression(bold("Irradiation
dose (Gy)")))) + ylab(expression(bold("GmmNegeV_ ")~bold("Hypoxia
Transformed relative density"))))
dev.off()

## png
## 2
```
